# Supplementary material for: Transcriptome sequencing to detect gene fusions in cancer
Source: Springer Nature journal article supplement (doi:10.1038/nature07638), 2009-01-11
Supplement: 41586_2009_BFnature07638_MOESM260_ESM.pdf [file 41586_2009_BFnature07638_MOESM260_ESM.pdf]

## SUPPLEMENTARY DISCUSSION

### Characterization of cancer mutations

Mutations in cancers have been conventionally identified through cytogenetic and molecular techniques<sup>1</sup>, later supplanted with sequencing of specific cancer types<sup>2-4</sup>, or candidate genes<sup>5-7</sup>. A number of national efforts are underway to comprehensively characterize the genomic alterations in cancer including The Cancer Genome Atlas Project (TCGA, <http://cancergenome.nih.gov/index.asp>). More recently, high throughput ‘next generation sequencing’ methods have been used for enumeration of genome-wide aberrations in cancers<sup>8,9</sup>. While considerable effort has been vested in discovering base change mutations (and SNPs) in cancers<sup>3,4,10,11</sup>, ‘gene-fusions’ have not been systematically investigated thus far. Part of the reason is that solid tumors pick up many non-specific aberrations during tumor evolution, making it difficult to distinguish causal/driver aberrations from secondary/insignificant mutations. We believe that the problem of non-specific genetic aberrations is mitigated by sequencing the transcriptome, which restricts the enquiry to ‘expressed sequences’, thus enriching the data for potentially ‘functional’ mutations. Not surprisingly, the recent gene fusions discovered in prostate and lung cancer were found through transcriptome<sup>12,13</sup> and proteome<sup>14</sup> analyses. We therefore considered employing massively parallel transcriptome sequencing to discover chimeric transcripts, representing functional gene fusions.

### Integration of short and long read sequencing for chimera discovery reduces false positives

Experimental validation revealed that the integration of long and short read technologies decreases false positive candidates, thereby providing a higher fidelity set of *bona fide* fusion candidates. As shown in Supplementary Figure 3, we assessed the expression of 16 chimeras nominated by the long read sequencing platform but lacked short reads spanning the predicted fusion boundary. The fact that all of these chimeras failed to produce a signal, yet 67% (**Supplementary Table 4**) of our nominated chimeras from the integrated approach were experimentally validated confirms that integrating both sequencing platforms effectively reduces false positive nominations.

### Complex intra-chromosomal rearrangements in VCaP

One of the striking observations from our experimentally validated VCaP chimeras was the identification of a complex intra-chromosomal rearrangement involving *HJURP*. The fact that both exon 8 and 9 of *HJURP* fuse to different genes suggests a breakpoint resides within the intron (**Fig. 2b**). Both of these gene fusions were confirmed by qRT-PCR in VCaP and VCaP-Met, and were found to be absent in other samples tested. This complex intra-chromosomal rearrangement was also confirmed by FISH analysis. *HJURP* has been shown to be associated with genomic instability and immortality in cancer cells<sup>15</sup>, while *INPP4A* encodes one of the enzymes involved in phosphatidylinositol signaling pathways and *EIF4E2* is a eukaryotic translation initiation factor (<http://smd.stanford.edu/cgi-bin/source/sourceSearch>)<sup>2</sup>.

## LNCaP chimeras

Interestingly, our top gene fusion nomination in LNCaP cells involved the fusion of *MIPOLI-DGKB*. This gene fusion may represent a harbinger of *ETV1* cryptic rearrangement, a putative driver mutation in the LNCaP prostate cancer cell line. Moreover, we observed the LNCaP cells harbor multiple fusions, similar to our observations in VCaP. One of the validated examples is the fusion between exon 7 of *MRPS10* from chromosome 6 with exon 7 of *HPR* of chromosome 16 (**Supplementary Fig. 14a**). *MRPS10-HPR* was confirmed by FISH and validated by qRT-PCR in LNCaP, but not observed in VCaP, VCaP-Met, RWPE, PREC, or Met 2 (**Supplementary Fig. 14b-e**). Overall, the detection of multiple gene fusions in individual cancer samples argues for a more widespread and more nuanced role of gene fusions in cancer.

## Transcriptome sequencing reveals read-through chimeras

One of the advantages of high-throughput sequencing is that it provides an unbiased view of the transcriptome. This enabled us to identify not only inter-chromosomal gene fusions and intra-chromosomal gene fusions involving non-adjacent genes, but also chimeras between adjacent genes, or read-throughs. For instance, a chimera between exon 2 of *C19orf25* with an intron of the neighboring gene *APC2* in LNCaP cells (**Supplementary Fig. 6a**). Experimental validation demonstrated a lower expression level of *C19orf25-APC2(intron)* than observed for gene fusions and weak expression in multiple cell lines suggesting they are more broadly expressed. A similar pattern was observed for *WDR55-DND1* (**Supplementary Fig. 6b**), *MBTPS2-YY2* (**Supplementary Fig. 6c**), and *ZNF649-ZNF577* (**Supplementary Fig. 6d**).

## Array CGH analysis of gene fusions

Many studies utilize genomic information for mining gene fusion candidates<sup>8,16</sup>. Therefore, we were interested in determining whether transcriptome data detects chimeras that would not be apparent from genomic DNA analysis. To do so, we integrated unbalanced genomic copy number change data from array comparative genomic hybridization of matched samples and monitored genomic aberrations within our gene fusion candidates (**Supplementary Methods**). This revealed breakpoints in genes involved in two gene fusion candidates, *USP10-ZDHHC7*, and *MIPOLI-DGKB* (**Supplementary Table 4**). More specifically, we observed a homozygous deletion spanning the region between *USP10-ZDHHC7* in VCaP cells as well as in the parental metastatic prostate cancer tissue from which VCaP is derived (VCaP-Met) but not in the normal prostate cell line RWPE (**Supplementary Fig. 15**). Taken together, this suggests that a deletion coupled with a complex rearrangement may have led to the *USP10-ZDHHC7* fusion. qRT-PCR based evaluation confirmed this fusion to be specific to VCaP and its parental tissue, VCaP-Met, and not in LNCaP, RWPE, PREC, or metastatic prostate cancer tissue (Met 2) (**Fig. 2a**). In LNCaP cells, for the *MIPOLI-DGKB* fusion a breakpoint was found only in *DGKB* but not in *MIPOLI*. Furthermore, absence of breakpoints in all other fusion chimeras examined suggests that the majority of fusion gene candidates identified by sequencing would not have been discovered by mining genomic

copy number aberration data. Moreover, while only a subset of genomic rearrangements potentially represent functional gene fusions, most chimeric transcripts signify productive fusions, with likely roles in the biology of cells they are found in.

## MATERIALS AND METHODS

### Samples and cell lines

The benign immortalized prostate cell line RWPE and the prostate cancer cell line LNCaP was obtained from the American Type Culture Collection. Primary benign prostatic epithelial cells (PrEC) were obtained from Cambrex Bio Science. The prostate cancer cell line MDA-PCa 2B was provided by E. Keller. The prostate cancer cell line 22-RV1 was provided by J. Macoska. VCaP was derived from a vertebral metastasis from a patient with hormone-refractory metastatic prostate cancer<sup>17</sup>, and was provided by Ken Pienta.

Androgen stimulation experiment was carried out with LNCaP and VCaP cells grown in charcoal-stripped serum containing media for 24 h, before treatment with 1% ethanol or 1 nM of methyltrienolone (R1881, NEN Life Science Products) dissolved in ethanol, for 24 and 48 h. Total RNA was isolated with RNeasy mini kit (Qiagen) according to the manufacturer's instructions.

Prostate tissues were obtained from the radical prostatectomy series at the University of Michigan and from the Rapid Autopsy Program<sup>18</sup>, University of Michigan Prostate Cancer Specialized Program of Research Excellence Tissue Core. All samples were collected with informed consent of the patients and prior approval of the institutional review board.

### 454 FLX Sequencing

PolyA+ RNA was purified from 50µg total RNA using two rounds of selection on oligo-dT containing paramagnetic beads using Dynabeads mRNA Purification Kit (DynaL Biotech, Oslo, Norway), according to the manufacturer's instructions. 200 ng mRNA was fragmented at 82°C in Fragmentation Buffer (40 mM Tris-Acetate, 100 mM Potassium Acetate, 31.5 mM Magnesium Acetate, pH 8.1) for 2 minutes. First strand cDNA library was prepared using Superscript II (Invitrogen) according to standard protocols and directional adaptors were ligated to the cDNA ends for clonal amplification and sequencing on the Genome Sequencer FLX. The 5'-end Adaptor A has a 5' overhang of 5 nucleotides and the 3'-end Adaptor B has a 3' overhang of 6 random nucleotides:

$$\begin{array}{l} 5' - \text{NANNACTGATGGCGCGAGGGAGGC} - 3' \\ \text{GACTACCGCGCTCCCTCCG} - 5' \end{array}$$

$$\begin{array}{l} 5' - \text{biotin-GCCTTGCCAGCCCGCTCAGNNNNNN} - \text{P} - 3' \\ 3' - \text{CGGAACGGTCGGGCGAGTC} \end{array}$$

The adaptor ligation reaction was carried out in Quick Ligase Buffer (New England Biolabs, Ipswich, MA) containing 1.67 µM of the Adaptor A, 6.67 µM of the Adaptor B and 2000 units of T4 DNA Ligase (New England Biolabs, Ipswich, MA) at 37°C for 2 hours. Adapted library was recovered with 0.05% Sera-Mag30 streptavidin beads (Seradyn Inc, Indianapolis, IN) according to manufacturer's instructions. Finally, the sscDNA library was purified twice with RNAClean (Agencourt, Beverly, MA) as per the manufacturer's directions except the



amount of beads was reduced to 1.6X the volume of the sample. The purified sscDNA library was analyzed on an RNA 6000 Pico chip on a 2100 Bioanalyzer (Agilent Technologies, Santa Clara, CA) to confirm a size distribution between 450 to 750 nucleotides, and quantified with Quant-iT Ribogreen RNA Assay Kit (Invitrogen Corporation, Carlsbad, CA) on a Synergy HT (Bio-Tek Instruments Inc, Winooski, VT) instrument following the manufacturer's instructions. The library was PCR amplified with 2  $\mu$ M each of Primer A (5'-GCC TCC CTC GCG CCA-3') and Primer B (5'-GCC TTG CCA GCC CGC-3'), 400  $\mu$ M dNTPs, 1X Advantage 2 buffer and 1  $\mu$ l of Advantage 2 polymerase mix (Clontech, Mountain View, CA). The amplification reaction was performed at: 96°C for 4 min; 94°C for 30 sec, 64°C for 30 sec, repeating steps 2 and 3 for a total of 20 cycles, followed by 68°C for 3 minutes. The samples were purified using AMPure beads and diluted to a final working concentration of 200,000 molecules per  $\mu$ l. Emulsion beads for sequencing were generated using Sequencing emPCR Kit II and Kit III and sequencing was carried out using 600,000 beads.

### Normalization by Subtraction

mRNA from the prostate cancer cell line VCaP was hybridized with the subtractor cell line LNCaP 1st-strand cDNA immobilised on magnetic beads (Dynabeads, Invitrogen), according to the manufacturers instructions. Transcripts common to both the cells were captured and removed by magnetic separation of bead-bound subtractor cDNA and the subtracted VCaP mRNA left in the supernatant was recovered by precipitation and used for generating sequencing library as described. Efficiency of normalization was assessed by qRT-PCR assay of levels of select transcripts in the sample before and after the subtraction (data not shown).

### Illumina Genome Analyzer Sequencing

200ng mRNA was fragmented at 70°C for 5 min in a Fragmentation buffer (Ambion), and converted to first strand cDNA using Superscript III (Invitrogen), followed by second strand cDNA synthesis using E coli DNA pol I (Invitrogen). The double stranded cDNA library was further processed by Illumina Genomic DNA Sample Prep kit, and it involved end repair using T4 DNA polymerase, Klenow DNA polymerase, and T4 Polynucleotide kinase followed by a single <A> base addition using Klenow 3' to 5' exo<sup>-</sup> polymerase, and was ligated with Illumina's adaptor oligo mix using T4 DNA ligase. Adaptor ligated library was size selected by separating on a 4% agarose gel and cutting out the library smear at 200bp (+/- 25bp). The library was PCR amplified by Phu polymerase (Stratagene), and purified by Qiaquick PCR purification kit (Qiagen). The library was quantified with Quant-iT Picogreen dsDNA Assay Kit (Invitrogen Corporation, Carlsbad, CA) on a Modulus™ Single Tube Luminometer (Turner Biosystems, Sunnyvale, CA) following the manufacturer's instructions. 10nM library was used to prepare flowcells with approximately 30,000 clusters per lane.

### Sequence datasets

Human genome build 18 (hg18) was used as a reference genome. All UCSC and Refseq transcripts were downloaded from the UCSC genome browser (<http://genome.ucsc.edu/>)<sup>19</sup>.

Sequences of previously identified *TMPRSS2-ERGA* fusion transcript (Genbank accession: DQ204772) and *BCR-ABL1* fusion transcript (Genbank accession: M30829) were used for reference.

### Short read chimera discovery

Short reads that do not completely align to the human genome, Refseq genes, mitochondrial, ribosomal, or contaminant sequences are categorized as non-mapping. For many chimeras we expect that there will be a larger portion mapping to a fusion partner (major alignment), and smaller portion aligning to the second partner (minor alignment). Our approach is therefore divided into two phases in which we focus on first identifying the major alignment and then performing a more exhaustive approach for identifying the minor alignment. In the first phase all non-mapping reads are aligned against all exons of Refseq genes using Vmatch, a pattern matching program<sup>20</sup>. Only reads that have an alignment of 12 or more nucleotides to an exon boundary are kept as potential chimeras. In the second phase, the non-mapping portion of the remaining reads are then mapped to all possible exon boundaries using a Perl script that utilizes regular expressions to detect alignments of as few as six nucleotides. Only those short reads that show partial alignment to exon boundaries of two separate genes are categorized as chimeras. It is possible to have a chimera that has 28 nucleotides aligning to gene x and 8 nucleotides that align to gene y and z because the 8-mer does not provide enough sequence resolution to distinguish between gene y and gene z. Therefore we would categorize this as two individual chimeras. If a sequence forms more than five chimeras it is discarded because it is ambiguous. To minimize false positives, we require that a predicted gene fusion event has at least two supporting chimeras.

### Long and short read integrated chimera discovery

All 454 reads are aligned against the human Refseq collection using BLAT, a rapid mRNA/DNA alignment tool<sup>21</sup>. Using a Perl script, the BLAT output files were parsed to detect potential chimeric reads. A read is categorized as completely aligning if it shows greater than 90% alignment to a known Refseq transcript. These are then discarded as they almost completely align and therefore are not characteristic of a chimera. From the remaining reads, we want to query for reads having partial alignment, with minimal overlap, to two Refseq transcripts representing putative chimeras. To accomplish this, we iterate the all possible BLAT alignments for a putative chimera, extracting only those partial alignments that have no more than a six nucleotide, or two codon, overlap. This step reduces false positive chimeras introduced by repetitive regions, large gene families, and conserved domains. Additionally, while our approach tolerates overlap between the partial alignments, it filters those having more than ten or more nucleotides between the partial alignments.

The short reads (36 nucleotides) generated from the Illumina platform are parsed by aligning them against the Refseq database and the human genome using Eland, an alignment tool for short reads. Reads that align completely or fail quality control are removed leaving only the “non-mapping” reads; a rich source for chimeras. These non-mapping short reads are subsequently aligned against all putative long read chimeras (obtained as described above) using Vmatch<sup>20</sup>, a pattern matching program. A Perl script is used to parse the Vmatch output

to extract only those reads that span the fusion boundary by at least three nucleotides on each side. Following this integration, the remaining putative chimeras are categorized as inter- or intra-chromosomal chimeras based on whether the partial alignments are located on different or the same chromosomes, respectively. Those intra-chromosomal chimeras that have partial alignments to adjacent genes are believed to be the product of co-transcription of adjacent genes coupled with intergenic splicing (CoTIS)<sup>22</sup>, alternatively known as read-throughs. The remaining intra-chromosomal and all inter-chromosomal chimeras are considered candidate gene fusions.

One additional source of false positive chimeras could be an unknown transcript that is not in Refseq. Due to its absence in the Refseq database, the corresponding long read would not be able to show a complete alignment, but instead show partial hits. Subsequently, short reads spanning this transcript would naturally validate the artificially produced fusion boundary. Therefore, to remove these candidates, we aligned all of the chimeras against the human genome using BLAT. If the long read had greater than 90% alignment to one genomic location, it is considered a novel transcript rather than a chimeric read. The remaining chimeras are given a score which is calculated by multiplying the long read coverage spanning the fusion boundary against the short read coverage spanning the fusion boundary.

### Coverage analysis

Transcript coverage for every gene locus was calculated from the total number of passing filter reads that mapped, via ELAND, to exons. The total count of these reads was multiplied by the read length and divided by the longest transcript isoform of the gene as determined by the sum of all exon lengths as defined in the UCSC knownGene table (Mar. 2006 assembly). Nucleotide coverage was determined by enumerating the total reads, based on ELAND mappings, at every nucleotide position within a non-redundant set of exons from all possible UCSC transcript isoforms.

### Array CGH analysis

Oligonucleotide comparative genomic hybridization is a high-resolution method to detect unbalanced copy number changes at whole genome level. Competitive hybridization of differentially labeled tumor and reference DNA to oligonucleotide printed in an array format (Agilent Technologies, USA) and analysis of fluorescent intensity for each probe will detect the copy number changes in the tumor sample relative to normal reference genome. We identified genomic breakpoints at regions with a change in copy number level of at least one copy ( $\log \text{ratio} \pm 0.5$ ) for gains and losses involving more than one probe representing each genomic interval as detected by the aberration detection method (ADM) in CGH analytics algorithm.

### Real Time PCR validation

Quantitative PCR (QPCR) was performed using Power SYBR Green Mastermix (Applied Biosystems, Foster City, CA) on an Applied Biosystems Step One Plus Real Time PCR System as described<sup>23</sup>. All oligonucleotide primers were synthesized by Integrated DNA

Technologies (Coralville, IA) and are listed in **Table S8**. *GAPDH*<sup>24</sup>, primer was as described. All assays were performed in duplicate or triplicate and results were plotted as average fold change relative to *GAPDH*.

Quantitative PCR for *SLC45A3-ELK4* was carried out by Taqman assay method using fusion specific primers and Probe #7 of Universal Probe Library (UPL), Human (Roche) as the internal oligonucleotide, according to manufacturer's instructions. *PGKI* was used as housekeeping control gene for UPL based Taqman assay (Roche), as per manufacturer's instructions. HMBS (Applied Biosystems, Taqman assay Hs00609297\_m1) was used as housekeeping gene control for Taqman assays according to standard protocols (Applied Biosystems).

### **Fluorescence in situ hybridization (FISH)**

FISH hybridizations were performed on VCaP, LNCaP, and FFPE tumor and normal tissues. BAC clones were selected from UCSC genome browser. Following colony purification midi prep DNA was prepared using QiagenTips-100 (Qiagen, USA). DNA was labeled by nick translation labeling with biotin-16-dUTP and digoxigenin-11-dUTP (Roche, USA). Probe DNA was precipitated and dissolved in hybridization mixture containing 50% formamide, 2XSSC, 10% dextran sulphate, and 1% Denhardt's solution. About 200ng of labeled probes was hybridized to normal human chromosomes to confirm the map position of each BAC clone. FISH signals were obtained using anti digoxigenin-fluorescein and alexa fluor594 conjugate for green and red colors respectively. Fluorescence images were captured using a high resolution CCD camera controlled by ISIS image processing software (Metasystems, Germany).

### **Affymetrix Genome-Wide Human SNP Array 6.0**

1 µg each of genomic DNA samples was sent to Affymetrix service centers (Center for Molecular Medicine, Grand Rapid, MI and Vanderbilt Affymetrix Genotyping Core, Nashville, TN) for genomic level analysis of 15 samples on the Genome-Wide Human SNP Array 6.0. Copy number analysis was conducted using the Affymetrix Genotyping Console software and visualizations were generated by the Genotyping Console (GTC) browser.

**Supplementary Table 1. Summary of normalized and non-normalized VCaP 454 libraries**

| Sample          | Normalized VCaP | Non-normalized VCaP |
|-----------------|-----------------|---------------------|
| Subtracted      | Yes             | No                  |
| Total Reads     | 575985          | 551780              |
| Average length  | 218.9           | 226.5               |
| Genes*          | 2687            | 2857                |
| Reads / Gene    | 214.36          | 193.14              |
| Chimeras        | 118             | 428                 |
| Reads / chimera | 4881.3          | 1289.3              |

\* A read must be a best hit to a gene with greater than 90% alignment

**Supplementary Table 2. Top long read chimera candidates.** The following list highlights the top VCaP chimeras identified using solely 454 technology. Only those chimeras that had more than one sequence confirmed a fusion boundary are shown in this list. Chimeras highlighted in yellow were confirmed by short read technology and experimentally validated. Chimeras highlighted in blue were found by long read technology but lacked short reads spanning the predicted fusion boundary and failed experimental validation.

| 454 Reads | Gene 1    | Chromosomal location      | Description                                      | Gene 2    | Chromosomal location         | Description                                      |
|-----------|-----------|---------------------------|--------------------------------------------------|-----------|------------------------------|--------------------------------------------------|
| 8         | EFTUD2    | chr17:40283805-40332289   | U5 snRNP-specific protein                        | NDUFB2    | chr7:140042950-140052915     | NADH dehydrogenase (ubiquinone) 1 beta           |
| 7         | C9orf152  | chr9:112001667-112009735  | hypothetical protein LOC401546                   | SBK1      | chr16:28211341-28242671      | SH3-binding domain kinase 1                      |
| 6         | HNRPC     | chr14:20749432-20772192   | heterogeneous nuclear ribonucleoprotein C        | P4HB      | chr17:77394323-77411833      | prolyl 4-hydroxylase, beta subunit precursor     |
| 5         | EIF2AK1   | chr7:6029989-6065302      | heme-regulated initiation factor 2-alpha kinase  | JTV1      | chr7:6015408-6029991         | JTV1                                             |
| 4         | LPHN1     | chr19:14119549-14177997   | latrophilin 1 isoform 1 precursor                | SUZ12     | chr17:27288185-27352162      | joined to JAZF1                                  |
| 3         | RPS14     | chr5:149803985-149809512  | ribosomal protein S14                            | PPIA      | chr7:44802766-44809241       | peptidylprolyl isomerase A                       |
| 3         | RPL13A    | chr19:54682677-54687376   | ribosomal protein L13a                           | CANX      | chr5:179058536-179091245     | calnexin precursor                               |
| 3         | NGRN      | chr15:88609899-88616447   | neugrin, neurite outgrowth associated            | TMEM87A   | chr15:40290018-40353047      | transmembrane protein 87A                        |
| 3         | MIA3      | chr1:220858067-220907974  | melanoma inhibitory activity family, member 3    | C1orf80   | chr1:220,907,978-220,952,487 | hypothetical protein LOC64853                    |
| 3         | MIA2      | chr14:38772876-38792326   | melanoma inhibitory activity 2                   | CTAGE5    | chr14:38806079-38890148      | CTAGE family, member 5                           |
| 3         | CNOT1     | chr16:57134733-57221251   | CCR4-NOT transcription complex, subunit 1        | SETD6     | chr16:57106928-57111053      | SET domain containing 6                          |
| 3         | C14orf130 | chr14:92743170-92765314   | hypothetical protein LOC55148                    | HSP90B1   | chr12:102848319-102865833    | heat shock protein 90kDa beta, member 1          |
| 3         | C12orf26  | chr12:81276455-81397076   | hypothetical protein LOC84190                    | CCDC59    | chr12:81270220-81276330      | coiled-coil domain containing 59                 |
| 3         | ARHGEF12  | chr11:119713156-119865855 | Rho guanine nucleotide exchange factor (GEF) 12  | SCD       | chr10:102096762-102114578    | stearoyl-CoA desaturase                          |
| 3         | ARHGEF12  | chr11:119713156-119865855 | Rho guanine nucleotide exchange factor (GEF) 12  | PLAA      | chr9:26894518-26925207       | phospholipase A2-activating protein              |
| 3         | AMD1      | chr6:111302680-111323606  | S-adenosylmethionine decarboxylase 1             | UBE1DC1   | chr3:133861836-133879312     | ubiquitin-activating enzyme E1-domain containing |
| 2         | ZNF667    | chr19:61643018-61680555   | zinc finger protein 667                          | PAR6B     | chr20:48781488-48803685      | PAR-6 beta                                       |
| 2         | ZNF649    | chr19:57084300-57100059   | zinc finger protein 649                          | ZNF577    | chr19:57066362-57083009      | zinc finger protein 577                          |
| 2         | YWHAZ     | chr8:102000090-102033447  | tyrosine 3/tryptophan 5 -monooxygenase           | CTNND1    | chr11:57285810-57343228      | catenin, delta 1                                 |
| 2         | XTP7      | chr19:50407719-50429309   | protein 7 transactivated by hepatitis B virus X  | FLJ21062  | chr7:89712461-89777622       | hypothetical protein LOC79846                    |
| 2         | USP10     | chr16:83291056-83371028   | ubiquitin specific protease 10                   | ZDHHC7    | chr16:83565573-83602642      | zinc finger, DHHC-type containing 7              |
| 2         | TYMS      | chr18:647604-663499       | thymidylate synthetase                           | ENOSF1    | chr18:664001-702676          | enolase superfamily member 1 isoform rTS beta    |
| 2         | TTC6      | chr14:37334265-37381247   | tetratricopeptide repeat domain 6                | CTSC      | chr11:87666408-87710589      | cathepsin C isoform a preproprotein              |
| 2         | TSEN34    | chr19:59386009-59389338   | tRNA splicing endonuclease 34 homolog            | C17orf79  | chr17:27203012-27210369      | hypothetical protein LOC55352                    |
| 2         | TLOC1     | chr3:171167305-171193497  | translocation protein 1                          | LAMC1     | chr1:181259176-181381350     | laminin, gamma 1 precursor                       |
| 2         | TIA1      | chr2:70290080-70329283    | TIA1 protein                                     | DIRC2     | chr3:123996597-124081451     | disrupted in renal carcinoma 2                   |
| 2         | TERF2IP   | chr16:74239185-74248829   | telomeric repeat binding factor 2, interacting   | AKAP12    | chr6:151688516-151719601     | A-kinase anchor protein 12                       |
| 2         | SMC4L1    | chr3:161600124-161614999  | SMC4 structural maintenance of chromosomes       | SAR1B     | chr5:133970018-133996426     | SAR1a gene homolog 2                             |
| 2         | SLCO1A2   | chr12:21313094-21379099   | organic anion transporting polypeptide A isoform | CTNND1    | chr11:57285810-57343228      | catenin, delta 1                                 |
| 2         | SKIV2L2   | chr5:54639373-54756562    | superkiller viralicidic activity 2-like 2        | MARCKSL1  | chr1:32572027-32574410       | MARCKS-like 1                                    |
| 2         | SF1       | chr11:64288654-64302817   | splicing factor 1                                | TIAL1     | chr10:121322968-121346531    | TIA-1 related protein                            |
| 2         | SET       | chr9:130485755-130498496  | SET translocation (myeloid leukemia-associated)  | RAC1      | chr7:6380651-6410123         | ras-related C3 botulinum toxin substrate 1       |
| 2         | RSBN1     | chr1:114105977-114156593  | round spermatid basic protein 1                  | RPL7      | chr8:74365428-74368423       | ribosomal protein L7                             |
| 2         | RPS17     | chr15:81002559-81006263   | ribosomal protein S17                            | LOC402057 | chr22:30765435-30765974      | similar to 40S ribosomal protein S17             |



|   |           |                              |                                                  |               |                           |                                                  |
|---|-----------|------------------------------|--------------------------------------------------|---------------|---------------------------|--------------------------------------------------|
| 2 | RPL9      | chr4:39132140-39136602       | ribosomal protein L9                             | DHRS7         | chr14:59681252-59701857   | dehydrogenase/reductase (SDR family) member 7    |
| 2 | RAB4B     | chr19:45976011-45994687      | ras-related GTP-binding protein 4b               | EGLN2         | chr19:45998021-46006177   | EGL nine (C.elegans) homolog 2                   |
| 2 | POLR2K    | chr8:101232015-101235406     | DNA directed RNA polymerase II polypeptide K     | SFPQ          | chr1:35421788-35431322    | splicing factor proline/glutamine rich           |
| 2 | PLEKHN1   | chr1:891740-900347           | pleckstrin homology domain containing, family N  | GNG7          | chr19:2462218-2653746     | guanine nucleotide binding protein (G protein)   |
| 2 | PLEKHN1   | chr1:891740-900347           | pleckstrin homology domain containing, family N  | C16orf57      | chr16:56592806-56613023   | hypothetical protein LOC79650                    |
| 2 | PIGH      | chr14:67125776-67136770      | phosphatidylinositol glycan anchor biosynthesis, | PRDX1         | chr1:45749294-45760196    | peroxiredoxin 1                                  |
| 2 | PCBP2     | chr12:52132153-52161213      | poly(rC) binding protein 2                       | KLHDC6        | chr3:129124592-129189204  | kelch domain containing 6                        |
| 2 | OTUD5     | chrX:48664432-48699837       | OTU domain containing 5                          | HSP90AB1      | chr6:44322827-44329592    | heat shock 90kDa protein 1, beta                 |
| 2 | NUDT4     | chr12:92295832-92321155      | nudix-type motif 4                               | SLC41A1       | chr1:204024844-204048784  | solute carrier family 41 member 1                |
| 2 | NPM1      | chr5:170747403-170770493     | nucleophosmin 1                                  | CLEC2D        | chr12:9713576-9743306     | osteoclast inhibitory lectin isoform             |
| 2 | MDP-1     | chr14:23752998-23755081      | magnesium-dependent phosphatase 1                | CHMP4A        | chr14:23748627-23753025   | chromatin modifying protein 4A                   |
| 2 | MBTPS2    | chrX:21767675-21810794       | membrane-bound transcription factor peptidase,   | YY2           | chrX:21784524-21785642    | YY2 transcription factor                         |
| 2 | LOC402057 | chr22:30765435-30765974      | similar to 40S ribosomal protein S17             | RPS17         | chr15:81002559-81006263   | ribosomal protein S17                            |
| 2 | LHX3      | chr9:138227917-138234825     | LIM homeobox protein 3                           | CKAP2         | chr13:51927496-51948764   | cytoskeleton associated protein 2                |
| 2 | LEPR      | chr1:65658906-65875410       | leptin receptor                                  | NEK5          | chr13:51536901-51601215   | NIMA (never in mitosis gene a)-related kinase 5  |
| 2 | INPP4A    | chr2:98427845-98564716       | inositol polyphosphate-4-phosphatase, type 1     | DKFZp762E1312 | chr2:234410225-234427951  | HJURP                                            |
| 2 | HSP90B1   | chr12:102848319-102865833    | heat shock protein 90kDa beta, member 1          | SERF2         | chr15:41871769-41875579   | small EDRK-rich factor 2                         |
| 2 | HNRPK     | chr9:85773645-85783187       | heterogeneous nuclear ribonucleoprotein K        | ASAH1         | chr8:17958205-17986159    | N-acylsphingosine amidohydrolase 1               |
| 2 | GBF1      | chr10:103995299-104132639    | golgi-specific brefeldin A resistance factor 1   | ACTL6A        | chr3:180763402-180788887  | actin-like 6A                                    |
| 2 | FLJ20273  | chr4:40134545-40211349       | hypothetical protein LOC54502                    | HSP90AA1      | chr14:101616828-101623265 | heat shock protein 90kDa alpha (cytosolic)       |
| 2 | FARSLB    | chr2:223144406-223229071     | phenylalanyl-tRNA synthetase, beta subunit       | TRIM61        | chr4:166095048-166118268  | tripartite motif-containing 61                   |
| 2 | EPB41L4B  | chr9:111041833-111122842     | erythrocyte membrane protein band 4.1 like 4B    | TXNRD1        | chr12:103204857-103268192 | thioredoxin reductase 1                          |
| 2 | ENAH      | chr1:223741157-223907468     | enabled homolog                                  | ASAH1         | chr8:17958205-17986159    | N-acylsphingosine amidohydrolase 1               |
| 2 | EIF4G2    | chr11:10775169-10787158      | eukaryotic translation initiation factor 4       | PTP4A2        | chr1:32146380-32176575    | protein tyrosine phosphatase type IVA, member 2  |
| 2 | DNM1L     | chr12:32723404-32789851      | dynamitin 1-like protein                         | KLK2          | chr19:56068501-56075635   | kallikrein 2                                     |
| 2 | DNAJA5    | chr5:34965455-34994826       | DnaJ homology subfamily A member 5               | MYST3         | chr8:41906154-42028662    | MYST histone acetyltransferase                   |
| 2 | DDX56     | chr7:44571928-44580662       | DEAD (Asp-Glu-Ala-Asp) box polypeptide 56        | RPL37A        | chr2:217071765-217074433  | ribosomal protein L37a                           |
| 2 | CS        | chr12:54951750-54980442      | citrate synthase precursor                       | RAI14         | chr5:34691597-34868474    | retinoic acid induced 14                         |
| 2 | CARM1     | chr19:10883860-10894448      | coactivator-associated arginine                  | YIPF2         | chr19:10894444-10900357   | Yip1 domain family, member 2                     |
| 2 | C9orf152  | chr9:112001667-112009735     | hypothetical protein LOC401546                   | BASP1         | chr5:17270750-17329943    | brain abundant, membrane attached signal protein |
| 2 | C1orf80   | chr1:220,907,978-220,952,487 | hypothetical protein LOC64853                    | MIA3          | chr1:220884287-220907974  | melanoma inhibitory activity family, member 3    |
| 2 | C19orf42  | chr19:16617959-16631968      | hypothetical protein LOC79086                    | MST150        | chr5:150138060-150156491  | putative small membrane protein NID67            |
| 2 | C14orf2   | chr14:103448378-103457656    | 6.8 kDa mitochondrial proteolipid                | RPS24         | chr10:79463580-79470479   | ribosomal protein S24                            |
| 2 | BHLHB9    | chrX:101862310-101894025     | basic helix-loop-helix domain containing, class  | RPL7          | chr8:74365428-74368423    | ribosomal protein L7                             |
| 2 | BCOR      | chrX:39795443-39841663       | BCL-6 interacting corepressor                    | ZDHC9         | chrX:128766594-128805554  | zinc finger, DHHC domain containing 9            |
| 2 | ANKRD21   | chr21:13,904,369-13,935,777  | pote protein                                     | POTE8         | chr8:43266742-43337485    |                                                  |
| 2 | ABCC9     | chr12:21841591-21980895      | ATP-binding cassette, sub-family C, member 9     | EEF1G         | chr11:62083649-62098036   | eukaryotic translation elongation factor 1       |



**Supplementary Table 3. Illumina sequence summary statistics**

| Sample                                 | K562  |        | VCaP  |        | LNCaP |        | RWPE  |        | VCaP-Met |        | Met 3 |        | Met 4 |        |
|----------------------------------------|-------|--------|-------|--------|-------|--------|-------|--------|----------|--------|-------|--------|-------|--------|
| Total reads (millions)                 | 66.9  |        | 76.4  |        | 57.3  |        | 71.9  |        | 14       |        | 35    |        | 9.24  |        |
| Pass filter (millions)*                | 38.3  | 57.25% | 40.3  | 52.75% | 35.3  | 61.61% | 44.8  | 62.31% | 9.6      | 68.57% | 16.4  | 46.86% | 5.51  | 59.64% |
| Non-mapping reads (millions)**         | 2.08  | 5.43%  | 12.69 | 31.49% | 1.59  | 4.50%  | 1.77  | 3.95%  | 0.4      | 4.17%  | 1.1   | 6.71%  | 0.31  | 5.63%  |
| Redundantly mapping reads (millions)** | 1.42  | 3.71%  | 1.08  | 2.68%  | 1.23  | 3.48%  | 1.74  | 3.88%  | 0.71     | 7.40%  | 1.32  | 8.05%  | 0.45  | 8.17%  |
| Best hit uniquely maps (millions)**    | 19.86 | 51.85% | 15.48 | 38.41% | 19.34 | 54.79% | 26.13 | 58.33% | 7.36     | 76.67% | 12.59 | 76.77% | 4.3   | 78.04% |
| Mitochondrial reads (millions)**       | 1.89  | 4.93%  | 1.72  | 4.27%  | 3.19  | 9.04%  | 2.8   | 6.25%  | 0.81     | 8.44%  | 0.81  | 4.94%  | 0.37  | 6.72%  |
| Ribosomal reads (millions)**           | 13.09 | 34.18% | 9.35  | 23.20% | 10    | 28.33% | 12.34 | 27.54% | 0.31     | 3.23%  | 0.62  | 3.78%  | 0.09  | 1.64%  |

\* Percentage of total reads

\*\* Percentage of reads passing filter

## UCSC transcripts per sample

| Average Transcript Coverage | K562  | VCaP | LNCaP | RWPE | VCaP-Met | Met 3 | Met 4 |
|-----------------------------|-------|------|-------|------|----------|-------|-------|
| 1x                          | 13584 | 9382 | 7905  | 7586 | 15004    | 12310 | 13495 |
| 2-10x                       | 5550  | 9979 | 9809  | 9182 | 6079     | 8866  | 6308  |
| 11-100x                     | 549   | 2793 | 4400  | 5965 | 574      | 1708  | 746   |
| 101-1000x                   | 33    | 223  | 301   | 374  | 97       | 182   | 95    |
| > 1000x                     | 9     | 40   | 26    | 29   | 8        | 8     | 9     |

## Nucleotide frequency per sample

| Nucleotide coverage | K562     | VCaP     | LNCaP    | RWPE     | VCaP-Met | Met 3    | Met 4    |
|---------------------|----------|----------|----------|----------|----------|----------|----------|
| 1x                  | 16890720 | 16354691 | 14044350 | 12626171 | 17318415 | 19561549 | 17677022 |
| 2-10x               | 19840906 | 34200185 | 40047417 | 37775216 | 18868883 | 30855788 | 20365786 |
| 11-100x             | 2283451  | 13651323 | 20893997 | 28851663 | 2710638  | 7389198  | 2933772  |
| 101-1000x           | 123205   | 844799   | 1240273  | 2295184  | 199455   | 438471   | 229998   |
| 1001-10000x         | 133639   | 86440    | 64267    | 82156    | 18987    | 17925    | 18509    |
| 10001-100000x       | 267      | 3063     | 66890    | 5425     | 0        | 494      | 0        |
| > 100000x           | 0        | 0        | 266      | 0        | 0        | 0        | 0        |

**Supplementary Table 4. Chimera nominations from transcriptome sequencing**

| Rank | Library | 5' Gene         | 3' Gene       | # of Reads |     | Score* | Validated |
|------|---------|-----------------|---------------|------------|-----|--------|-----------|
|      |         |                 |               | Illumina   | 454 |        |           |
| 1    | VCaP    | <i>ZNF649</i>   | <i>ZNF577</i> | 14         | 2   | 28     | Yes       |
| 2    | VCaP    | <i>TMPRSS2</i>  | <i>ERG</i>    | 21         | 1   | 21     | Yes       |
| 3    | VCaP    | <i>INPP4A</i>   | <i>HJURP</i>  | 8          | 2   | 16     | Yes       |
| 4    | VCaP    | <i>USP10</i>    | <i>ZDHHC7</i> | 6          | 2   | 12     | Yes       |
| 5    | VCaP    | <i>HJURP</i>    | <i>EIF4E2</i> | 8          | 1   | 8      | Yes       |
| 6    | RWPE    | <i>WDR55</i>    | <i>DND1</i>   | 7          | 1   | 7      | Yes       |
| 7    | LNCaP   | <i>MIPOL1</i>   | <i>DGKB</i>   | 5          | 1   | 5      | Yes       |
| 8    | LNCaP   | <i>PPIA</i>     | <i>RPS14</i>  | 1          | 3   | 3      | No        |
| 9    | VCaP    | <i>RBM14</i>    | <i>RBM4</i>   | 2          | 1   | 2      | No        |
| 10   | LNCaP   | <i>C19orf25</i> | <i>APC2</i>   | 2          | 1   | 2      | Yes       |
| 11   | VCaP    | <i>FLJ46838</i> | <i>SALF</i>   | 2          | 1   | 2      | No        |
| 12   | VCaP    | <i>SLTM</i>     | <i>ZNF621</i> | 2          | 1   | 2      | No        |
| 13   | LNCaP   | <i>MDP-1</i>    | <i>CHMP4A</i> | 1          | 2   | 2      | No        |
| 14   | LNCaP   | <i>MBTPS2</i>   | <i>YY2</i>    | 1          | 2   | 2      | Yes       |
| 15   | LNCaP   | <i>MRPS10</i>   | <i>HPR</i>    | 1          | 1   | 1      | Yes       |

\* Score = 454 read count x Illumina read count

**Supplementary Table 5. Gene fusion candidates with previously reported copy number variations (CNVs) reported in the Database of Genomic Variants (<http://projects.tcag.ca/variation/>).**

| Gene                  | Copy Number Gain or Loss | Position                      | Reference(s)              | Pubmed ID |
|-----------------------|--------------------------|-------------------------------|---------------------------|-----------|
| <i>BCR</i>            | Gain                     | chr22:21,973,192..22,250,412  | (Perry et al., 2008)      | 18304495  |
|                       | Gain                     | chr22:21,983,119..22,145,329  | (Perry et al., 2008)      | 18304495  |
| <i>ABL1</i>           | Loss                     | chr9:132,580,357..132,584,940 | (de Smith et al., 2007)   | 17666407  |
|                       | -                        | chr9:132,727,387..133,018,382 | (Redon et al., 2006)      | 17122850  |
| <b><i>MPRS10</i></b>  |                          |                               |                           |           |
| <i>HPR</i>            | Loss                     | chr16:70,645,832..70,665,594  | (Wang et al., 2007)       | 17921354  |
|                       | Loss                     | chr16:70,647,656..70,669,810  | (Perry et al., 2008)      | 18304495  |
|                       | Loss                     | chr16:70,643,022..70,667,434  | (Perry et al., 2008)      | 18304495  |
|                       | Loss                     | chr16:70,655,469..70,675,458  | (Kidd et al., 2008)       | 18451855  |
|                       | Loss                     | chr16:70,666,462..70,671,389  | (Kidd et al., 2008)       | 18451855  |
|                       | -                        | chr16:70,533,845..70,831,848  | (Redon et al., 2006)      | 17122850  |
| <b><i>MIPOL1</i></b>  |                          |                               |                           |           |
| <i>DGKB</i>           | Loss                     | chr7:13405467..14521413       | (Sebat et al., 2004)      | 15273396  |
|                       | Loss                     | chr7:14477509..14477509       | (Levy et al., 2007)       | 17803354  |
|                       | Gain                     | chr7:14261667..14265007       | (Perry et al., 2008)      | 18304495  |
|                       | Loss                     | chr7:14179956..14189289       | (Perry et al., 2008)      | 18304495  |
| <b><i>TMPRSS2</i></b> |                          |                               |                           |           |
| <i>ERG</i>            | Loss                     | chr21:38835017..38838626      | (Wang et al., 2007)       | 17921354  |
|                       | Loss                     | chr21:38839050..38877931      | (Pinto et al., 2007)      | 17911159  |
| <b><i>USP10</i></b>   |                          |                               |                           |           |
| <b><i>ZDHC7</i></b>   |                          |                               |                           |           |
| <i>STRN4</i>          | Loss                     | chr19:51,898,389..52,062,144  | (Wong et al., 2007)       | 17160897  |
| <b><i>GPSN2</i></b>   |                          |                               |                           |           |
| <i>LMAN2</i>          | Loss                     | chr5:175467278..177401618     | (Korbel et al., 2008)     | 17901297  |
|                       | Loss                     | chr5:176669915..176829018     | (Jakobsson et al., 2008)  | 18288195  |
|                       | -                        | chr5:176550923..176735050     | (Redon et al., 2006)      | 17122850  |
| <b><i>AP3S1</i></b>   |                          |                               |                           |           |
| <b><i>EIF4E2</i></b>  |                          |                               |                           |           |
| <b><i>HJURP</i></b>   |                          |                               |                           |           |
| <b><i>INPP4A</i></b>  |                          |                               |                           |           |
| <b><i>RC3H2</i></b>   |                          |                               |                           |           |
| <b><i>RGS3</i></b>    |                          |                               |                           |           |
| <i>ZNF649</i>         | Loss                     | chr19:56951383..57296437      | (Redon et al., 2006)      | 17122850  |
|                       | Gain                     | chr19:56910738..57296437      | (Zogopoulos et al., 2007) | 17638019  |
|                       | -                        | chr19:57037904..57225638      | (Redon et al., 2006)      | 17122850  |
|                       | Gain                     | chr19:56919728..57322747      | (Pinto et al., 2007)      | 17911159  |
| <i>ZNF577</i>         | Loss                     | chr19:56951383..57296437      | (Redon et al., 2006)      | 17122850  |
|                       | Gain                     | chr19:56910738..57296437      | (Zogopoulos et al., 2007) | 17638019  |
|                       | -                        | chr19:57037904..57225638      | (Redon et al., 2006)      | 17122850  |
|                       | Gain                     | chr19:56919728..57322747      | (Pinto et al., 2007)      | 17911159  |
| <b><i>MTBPS2</i></b>  |                          |                               |                           |           |
| <b><i>YY2</i></b>     |                          |                               |                           |           |
| <i>C19orf25</i>       | Loss                     | chr19:1395419..1426391        | (Wang et al., 2007)       | 17921354  |
|                       | Loss                     | chr19:1426391..1477613        | (Jakobsson et al., 2008)  | 18288195  |
|                       | -                        | chr19:902641..1495933         | (Redon et al., 2006)      | 17122850  |
|                       | Loss                     | chr19:1,331,125..1,495,933    | (Wong et al., 2007)       | 17160897  |

|                |      |                            |                          |          |
|----------------|------|----------------------------|--------------------------|----------|
|                | -    | chr19:1271267..1950204     | (de Smith et al., 2007)  | 17666407 |
| <b>APC2</b>    | Loss | chr19:1395419..1426391     | (Wang et al., 2007)      | 17921354 |
|                | Loss | chr19:1426391..1477613     | (Jakobsson et al., 2008) | 18288195 |
|                | -    | chr19:902641..1495933      | (Redon et al., 2006)     | 17122850 |
|                | Loss | chr19:1,331,125..1,495,933 | (Wong et al., 2007)      | 17160897 |
|                | -    | chr19:1271267..1950204     | (de Smith et al., 2007)  | 17666407 |
| <b>SLC45A3</b> |      |                            |                          |          |
| <b>ELK4</b>    |      |                            |                          |          |
| <b>WDR55</b>   |      |                            |                          |          |
| <b>DND1</b>    |      |                            |                          |          |

**Supplementary Table 6. aCGH analysis of VCaP, LNCaP, and RWPE nominated chimeras from integrative approach.**

| Library | 5' partner | aCGH          |           |               | 3' partner | aCGH          |           |               |
|---------|------------|---------------|-----------|---------------|------------|---------------|-----------|---------------|
|         |            | vCaP          | LnCaP     | RWPE          |            | vCaP          | LnCaP     | RWPE          |
| VCaP    | ZNF649     | one copy gain | no change | no change     | ZNF577     | one copy gain | no change | no change     |
| VCaP    | TMPRSS2    | 1.2 copy gain | no change | no change     | ERG        | 1.2 copy gain | no change | no change     |
| VCaP    | INPP4A     | no change     | no change | no change     | HJURP      | no change     | no change | no change     |
| VCaP    | USP10      | breakpoint    | no change | 1.5 copy gain | ZDHHC7     | breakpoint    | no change | 1.5 copy gain |
| VCaP    | HJURP      | no change     | no change | no change     | EIF4E2     | no change     | no change | no change     |
| RWPE    | WDR55      | no change     | no change | one copy gain | DND1       | no change     | no change | one copy gain |
| LNCaP   | MIPOL1     | no change     | no change | no change     | DGKB       | breakpoint    | no change | no change     |
| LNCaP   | PPIA       | no change     | no change | no change     | RPS14      | no change     | no change | one copy gain |
| VCaP    | RBM14      | gain- 4copies | no change | no change     | RBM4       | gain-4 copies | no change | no change     |
| LNCaP   | C19orf25   | no change     | no change | no change     | APC2       | no change     | no change | no change     |
| VCaP    | FLJ46838   | no change     | no change | no change     | SALF       | no change     | no change | no change     |
| VCaP    | SLTM       | no change     | no change | no change     | ZNF621     | no change     | no change | no change     |
| LNCaP   | MDP-1      | no change     | no change | no change     | CHMP4A     | no change     | no change | no change     |
| LNCaP   | MBTPS2     | one copy gain | no change | no change     | YY2        | one copy gain | no change | no change     |
| LNCaP   | MRPS10     | no change     | no change | no change     | HPR        | no change     | no change | no change     |

**Supplementary Table 7. Overall summary of validated chimeras.** In-frame chimeras are denoted with an asterik.

| Chimera              | Chimera Class                       | Location      | 5' Gene                                                       | Location     | 3' Gene                                                             | Validated in          | Validated by                         |
|----------------------|-------------------------------------|---------------|---------------------------------------------------------------|--------------|---------------------------------------------------------------------|-----------------------|--------------------------------------|
| <i>BCR-ABL1</i>      | Class I: Translocation              | 22q11.23      | BCR, breakpoint cluster region                                | 9q34.1       | ABL1, c-abl oncogene 1, receptor tyrosine kinase                    | K562                  | Short read, qRT-PCR                  |
| <i>MRPS10-HPR</i>    | Class I: Translocation              | 6p21.1        | MRPS10, mitochondrial ribosomal protein S10                   | 16q22.1      | HPR, haptoglobin-related protein                                    | LNCaP                 | Long read, Short read, qRT-PCR, FISH |
| <i>MIPOL1-DGKB</i>   | Class II: Inter-chromosomal complex | 14q13.3-q21.1 | MIPOL1, mirror-image polydactyly 1                            | 7p21.2       | DGKB, diacylglycerol kinase, beta 90kDa                             | LNCaP                 | Long read, Short read, qRT-PCR, FISH |
| <i>TMPRSS2-ERG*</i>  | Class III: Interstitial Deletion    | 21q22.3       | TMPRSS2, transmembrane protease, serine 2                     | 21q22.3      | ERG, v-ets erythroblastosis virus E26 oncogene homolog (avian)      | VCaP, VCaP-Met        | Long read, Short read, qRT-PCR, FISH |
| <i>USP10-ZDHHC7*</i> | Class III: Interstitial Deletion    | 16q24.1       | USP10, ubiquitin specific peptidase 10                        | 16q24.1      | ZDHHC7, zinc finger, DHHC-type containing 7                         | VCaP, VCaP-Met        | Long read, Short read, qRT-PCR, aCGH |
| <i>STRN4-GPSN2*</i>  | Class IV: Intra-chromosomal complex | 19q13.2       | STRN4, striatin, calmodulin binding protein 4                 | 19p13.12     | GPSN2, glycoprotein, synaptic 2                                     | Met-3                 | Short read, qRT-PCR                  |
| <i>LMAN2-AP3S1</i>   | Class IV: Intra-chromosomal complex | 5q35.3        | LMAN2 lectin, mannose-binding 2                               | 5q22         | AP3S1, adaptor-related protein complex 3, sigma 1                   | VCaP, VCaP-Met        | Short read, qRT-PCR                  |
| <i>HJURP-EIF4E2*</i> | Class IV: Intra-chromosomal complex | 2q37.1        | HJURP, Holliday junction recognition protein                  | 2q37.1       | EIF4E2, eukaryotic translation initiation factor 4E family member 2 | VCaP, VCaP-Met        | Long read, Short read, qRT-PCR, FISH |
| <i>INPP4A-HJURP*</i> | Class II: Intra-chromosomal complex | 2q11.2        | INPP4A, inositol polyphosphate-4-phosphatase, type I          | 2q37.1       | HJURP, Holliday junction recognition protein                        | VCaP, VCaP-Met        | Long read, Short read, qRT-PCR, FISH |
| <i>RC3H2-RGS3</i>    | Class IV: Intra-chromosomal complex | 9q34          | RC3H2, ring finger and CCH-type zinc finger domains 2         | 9q32         | RGS3, regulator of G-protein signaling 3                            | VCaP, VCaP-Met        | Short read, qRT-PCR                  |
| <i>ZNF649-ZNF577</i> | Class V: Read-through               | 19q13.33      | ZNF649, zinc finger protein 649                               | 19q13.33     | ZNF577, zinc finger protein 577                                     | VCaP, VCaP-Met        | Long read, Short read, qRT-PCR       |
| <i>MBTPS2-YY2*</i>   | Class V: Read-through               | Xp22.1-p22.2  | MBTPS2, membrane-bound transcription factor peptidase, site 2 | Xp22.2-p22.1 | YY2, YY2 transcription factor                                       | VCaP, LNCaP, VCaP-Met | Long read, Short read, qRT-PCR       |
| <i>C19ORF25-APC2</i> | Class V: Read-through               | 19p13.3       | C19ORF25, chromosome 19 open reading frame 25                 | 19p13.3      | APC2, adenomatosis polyposis coli 2                                 | LNCaP                 | Long read, Short read, qRT-PCR       |
| <i>WDR55-DND1</i>    | Class V: Read-through               | 5q31.3        | WDR55, WD repeat domain 55                                    | 5q31.3       | DND1, dead end homolog 1 (zebrafish)                                | RWPE                  | Long read, Short read, qRT-PCR       |
| <i>SLC45A3-ELK4*</i> | Class V: Read-through               | 1q32.1        | SLC45A3, Solute carrier family 45 member 3                    | 1q32.1       | ELK4, ETS domain-containing protein                                 | Met-4                 | Short read, qRT-PCR                  |

**Supplementary Table 8. Primer sequences used for confirming fusion genes by qRT-PCR.**

| <b>Fusion Gene</b> | <b>Primer Sequence (5'-3')</b> |
|--------------------|--------------------------------|
| ARHGEF12-SCD-F     | GCTAAGGAAAGGGTGGGATG           |
| ARHGEF12-SCD-R     | TTGTGTTTGTTCATAATAAAAAGTGAA    |
| BCR-ABL(b3a2)-F    | GAGTCTCCGGGGCTCTATGG           |
| BCR-ABL(b3a2)-R    | GCCGCTGAAGGGCTTTTGAA           |
| DNM1L-KLK2-F       | GGATCCTCCCCTTCTTTCTG           |
| DNM1L-KLK2-R       | CAAACCTTGCTAGTTACTGCCTACC      |
| EFTUD2-NDUFB2-F    | CCCAGCACCTCTTCTGAGTC           |
| EFTUD2-NDUFB2-R    | AGAGAGGGGTGTAGGCATCA           |
| EGLN2-RAB4B-F      | GGATTGTCAACGTGCCCTAC           |
| EGLN2-RAB4B-R      | GAGCTAGACCCGGAGAGGAT           |
| EIF4A2-SPDEF-F     | GTGCACGAACTGGTAGACGA           |
| EIF4A2-SPDEF-R     | GGCAGAAAGCAACACAACCT           |
| LMAN2-AP3S1-F      | ACTGACGGCAACAGTGAACA           |
| LMAN2-AP3S1-R      | TGGAAAGTCTCCCTGATGATTT         |
| MDS1-EVI1-F        | ATGCAACAAGTTGTGCTGA            |
| MDS1-EVI1-R        | CAAACCTGAAAGACCCAGT            |
| MIA2-CTAGE5-F      | AGCCGACTCCTAACCGATCT           |
| MIA2-CTAGE5-R      | TGAATTCTGCATTTTCACCAA          |
| MIPOL1-DGKB-F      | CAGAGCGAGCAAATATGGAA           |
| MIPOL1-DGKB-R      | CTTGCTTCGGTTTCTTGTC            |
| NDRG1-SF3B5-F      | CAAAAACGAGACGCCAAATC           |
| NDRG1-SF3B5-R      | CAAAAACAAGACGCGTAGCA           |
| PDCL2-CLOCK-F      | GAAGCGGTTACAGGAATGGA           |
| PDCL2-CLOCK-R      | TTCTGAGCTCCAGCAGCTTT           |
| PRKAR1A-HEXIM1-F   | GAAGTGAAGCAGAGCAGAGCA          |
| PRKAR1A-HEXIM1-R   | CATTTGGCATTAAACAAAGATCAA       |
| RBM14-RBM4-F       | GTGTGACGTGGTGAAGGGT            |
| RBM14-RBM4-R       | AAATGGGCAGGAGAGGAAAG           |
| RC3H2-RGS3-F       | GCTAATGGTCAGAATGCTGCT          |
| RC3H2-RGS3-R       | CTTCTTCTGCTCCTGCGAGT           |
| SLC35A3-HIAT1-F    | GCTGTCAATAGTCCCCAAGC           |
| SLC35A3-HIAT1-R    | GGATTTGCAACCTCTTTATCG          |
| SMAD5-IDH1-F       | TTTGGGGATAAGGGAAAAGG           |
| SMAD5-IDH1-R       | GCTTTGCTCTGTGGGCTAAC           |
| STRN4-GPSN2-F      | CTGGGGGACTTGGCAGAT             |
| STRN4-GPSN2-R      | TCCAAGAAACACAGCTTCTCC          |
| TEAD1-ASCC3L1-F    | GGCTCAGGTTGTGGTAGAGG           |
| TEAD1-ASCC3L1-R    | TTGAGCCTGTCCTGGAACCTT          |
| TMPRSS2-ERG-F      | GGAGTAGGCGCGAGCTAAG            |
| TMPRSS2-ERG-R      | GTCCATAGTCGCTGGAGGAG           |
| USP10-ZDHHC7-F     | CGGAGTCCCAATGAAACG             |
| USP10-ZDHHC7-R     | GAGGAGGAGGACGATGAAGA           |
| ZNF577-ZNF649-F    | CCTTCCCAGAAGTGGTGGT            |
| ZNF577-ZNF649-R    | CACACGGGAGAGAGACCCTA           |
| MRPS10-HPR-F       | GATTCTTGGGCTTCCCACAT           |
| MRPS10-HPR-R       | CAAAGACACAATTAGAACAGTTACCA     |
| SLC45A3-ELK4-F     | GCAGATCCTGCCCTACACAC           |
| SLC45A3-ELK4-R     | AGCTGAAGAAGGAACTGCCA           |



**Supplementary Table 9. Sequences of chimeric transcripts, with GenBank accession numbers, reported in this manuscript. Fusion junction is denoted by ‘\*’.**

>*TMPRSS2-ERG* FJ423744  
GGAGTAGGCGCGAGCTAAGCAGGAGGCGGAGGCGGAGGCGGAGGGCGAGGGGCGGGGAGC  
GCCGCCTGGAGCGCGGCAG\*GAAGCCTTATCAGTTGTGAGTGAGGACCAGTCGTTGTTTGA  
GTGTGCCTACGGAACGCCACACCTGGCTAAGACAGAGATGACCGCGTCTCTCCAGCGA  
CTATGGACAGACTTCCAAGATGAGCCCACGCGTCCCTCAGCAGGATTGGCTGTCT

>*INPP4A-HJURP* FJ423742  
AGGTCTCAAGAATCAAAAACAAAACAAAATACAAACAGAGAGCAAGTGGGAAGATAAAT  
AACACTCCGAAATAACCTAGCTACACACTTTTGTGTTTCCAATTTTTCTTAGCATGAAATC  
ACTTTTCTCTTCCATCCTGTAAGACGTGTTCTCTCCT\*CTGCGCATGCACTCCAGGGCCTG  
GGTGAAGACCTGCGGGGCCATGCCATGCTCGTGTGTCAGGATCAGGCACTGCTCCAGTGT  
CACCG

>*ZNF649-ZNF577* FJ423743  
GGGGCTAGCAACTCTAGTATGTTTTCTCTCTTCTGTCTATTCTGGGCCTTCCCAGAAGTG  
GTGGTCAGGTATCATCTCAGGTCAAGCTACCACTGGAAATGATGATCTTCCCAGCCTGG  
AAGCTCCTTCTTCCATTACTGAAAATGTCTTGTTCCTATAGGCCAGAAC\*ACTCATCACAG  
CCATAGGGTCTCTCTCCCGTGTGAGTTCTGTGATGTACAATGAGCATTG

>*USP10-ZDHHC7* FJ423745  
ACGCGGGGAAGCAGCGTGAGCAGCCGGAGGATCGCGGAGTCCCAATGAAACGGGCAGCC  
ATGGCCCTCCACAGCCCGCAG\*GGTGCCTCAGGGAAATCATGCAGCCATCAGGACACAGGG  
TCCGGGACGTCGAGCACCATCCTCTCCTGGCTGAAAATGACAACATGACTCTTCATCGT  
CCTCCTCCTCCGAGGCTGACGTGGCTGACCGGGTCTGGTTCATCCGTGACGG

>*HJURP-EIF4E2* FJ423746  
CGATTCTTGTCTCGTTCCGTTTTTCTTCTCACCATCTTTCTGTGTGCTGTTTTCTTCA  
TTCTGATCATGGTCCCCTGTGTCATCATCTTTCAA\*CTCTCTTCTGAGTTGGGCTGTGAA  
GAGCTGCCCTGGTCTCCCGGTCTGACGGTGTGTCACCCCATCTGAGGCACCCAGGGAA  
TTGCCCTGGCGTCCGGAGCCCGTGGGTTCTGATAGCCTGGGTCTTTTTGCAGGGAAGTGA  
TGGT

>*MIPOL1-DGKB* FJ423747  
ACAGAGAGAACATTGTTTCCATCACTCAACAACAAAATGAGGAACTGGCTACTCAACTGC  
AACAAAGCTCTGACAGAGCGAGCAAATATGGAATTACAACCTTCAACATGCCAGAGAGGCCT  
CCCAAGTGGCCAATGAAAAAGTTCAAAA\*ATAAAAATTACACACAAGAACCAAGCCCCAAT  
GCTGATGGGCCCCGCTCCAAAAACCGGTTTTATTCTGCTCCCTCGTCAAAAGGACAAGAAA  
CCGAAGCAAGGAATAA

>*MRPS10-HPR* FJ423748  
GTCAGTGGGTTTGCCGATTCTTGGGCTTCCCACATA\*TTTCTTCTTTTTCTTCTGATAGT  
GTTTCCCAGATTGGCTCCTTGATGTGTTCTGGTAACTGTTCTAATTGTGCTTTTGTTACT  
TCCATGGCAACCCCTTCCAGGTAAGTTTTCA

>*WDR55-DND1* FJ423749  
CGCAAAAAAAGGGAGGACCCTGCGGGCTCTGAGCAGCAAGACTTGGAGCACCGATGAC  
TTCTTCGCAGGACTGAGGGAAGAGGGAGAAGACTCCATGGCTCAGGAAGAAAAGGAGGAG  
ACTGGGGATGACAATGACTGAAGGAATGAATTGAATCTTGAGACGGGTCTCACCAGGGT  
GCCTGTGGAGAAAGAATGGAGTCACTGTTAACCATGGTACCTGCCTCAGCCCCAGCAGA  
CCACAGGAGGTTCCG

>*C19orf25-APC2 (Intron)* FJ423750  
GAATCGGAAGTGGCTGCGTCGTCGACGCTGGGCTTTCCGGTCCCAGCGCCAGAGATGGGC  
TCCAAGGCAAAGAAGCGCGTGTGCTGCTGCCCCACCCGCCAGCGCCCCCAGGGTGGAGC  
AGATCCTGGAGGATGTGCGGGGTGCGCCGGCAGAGGATCCAGTGTTACCATCCTGGCCC  
CGGAAG\*GCTGGAGTGCAGTGGCGAGATCTCGACTCACTGCAGGCTCCGACTCCCCAGTTC  
AAGCGATT

>*MBTPS2-YY2* FJ423751  
TTGGGATTTTTCTCTTCAATATTTATCCCGGAGCATTGTTGATCTGTTCACTCATT  
TGCAACTTATATCGCCAGTCCAGCAGCAAGGATATTTTGTGCAG\*CCATGGCCTCCAACGA  
AGATTTCTCCATCACACAAGACCTGGAGATCCCGGCAGATATTGTGGAGCTCCACGACAT

CAATGTGGAGCCCCTTCCTATGGAGGACATTCCGACGGAAAGCGTCCAGTACG  
>*STRN4-GPSN2* FJ423752  
CTGGGGGACTTGGCAGATCTCACCGTCACCAACGACAACGACCTCAGCTGCGAT\*GTGGA  
GATTCTGGACGCAAAGACAAGGGAGAAGCTGTGTTTCTTGGA  
>*LMAN2-AP3S1* FJ423753  
ACTGACGGCAACAGTGAACATCTCAAGCGGGAGCATTGCTCATTAAAGCCCTACCAAG\*A  
GTGAAGATACACAACAGCAAATCATCAGGGAGACTTTCCA  
>*RC3H2-RGS3* FJ423754  
GCTAATGGTCAGAATGCTGCTGGGCCCTCTGCAGATTCTGTAAGTAAAA\*AAGGCAGAG  
TGCTTATTCACTTTGGAAGCGCACTCGCAGGAGCAGAAGAAG  
>*SLC45A3-ELK4* FJ423755  
GCTGAAGAAGGAAGTCCACAGGGTGATAGCACTGTCCATAGCAATGAG\*CTGCTTCTCC  
CGGTGGTAGAGGGAGGCCAGTGTGTAGGGGAGG

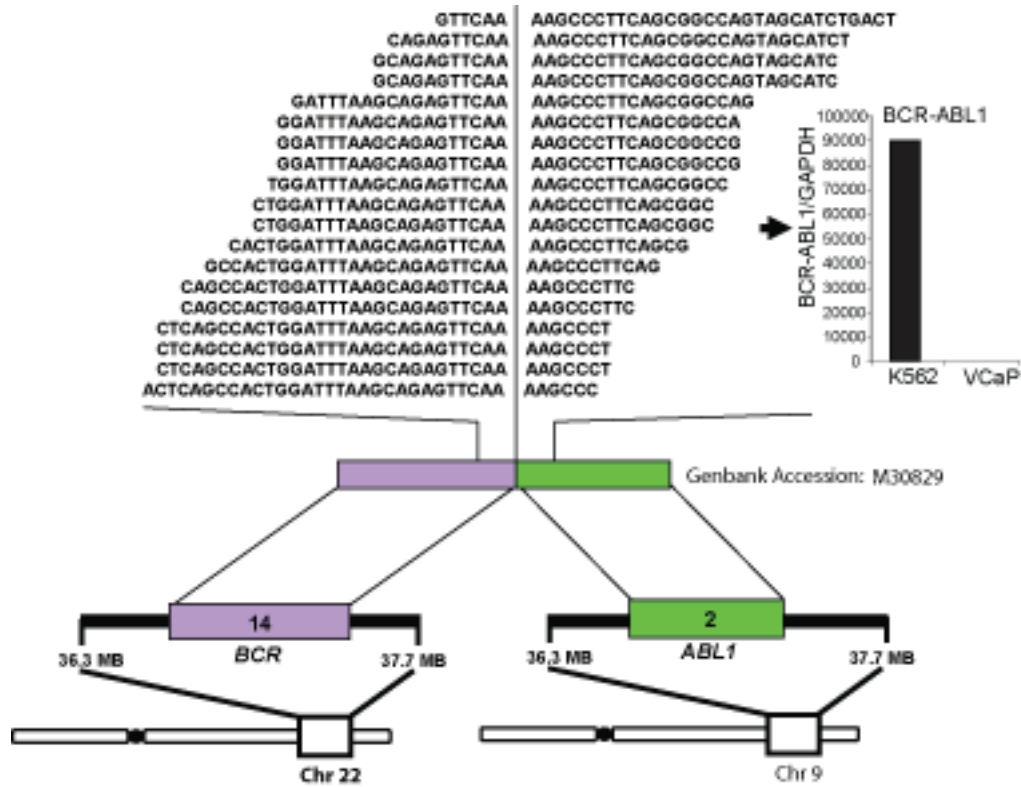

**Supplemental Figure 1: “Re-discovery” of the *BCR-ABL1* gene fusion using massively parallel sequencing of the transcriptome in the chronic myelogenous leukemia cell line K652. a,** The schematic bar represents the reference sequence *BCR-ABL1* (Genbank Accession No. M30829). *BCR* (purple), located on chromosome 22, fused with *ABL1* (green) on chromosome 9. Short read sequencing obtained from the Illumina platform are aligned above the bar. The inset represents qRT-PCR validation of the expression of *BCR-ABL1* fusion gene in K562 cells.

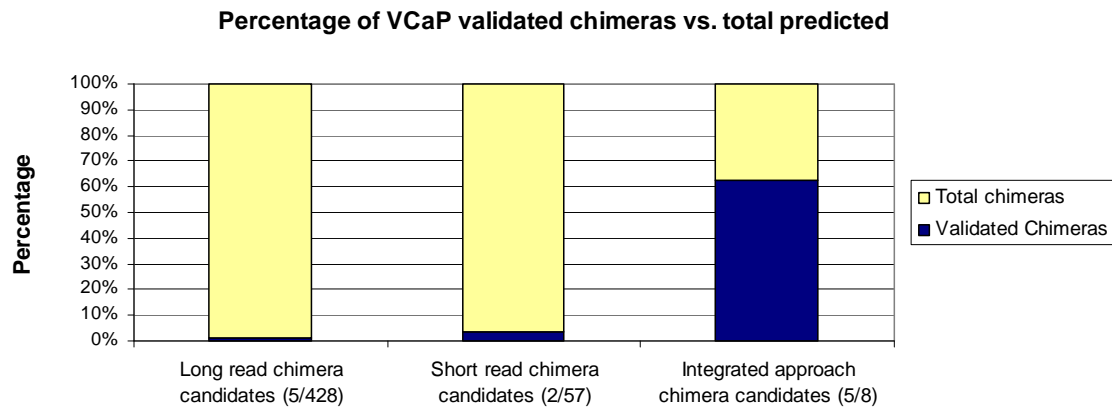

**Supplemental Figure 2: Histogram of predicted VCaP validated chimeras compared to total number of computationally predicted chimeras based on long read technology, short read technology, and an integrative approach.**

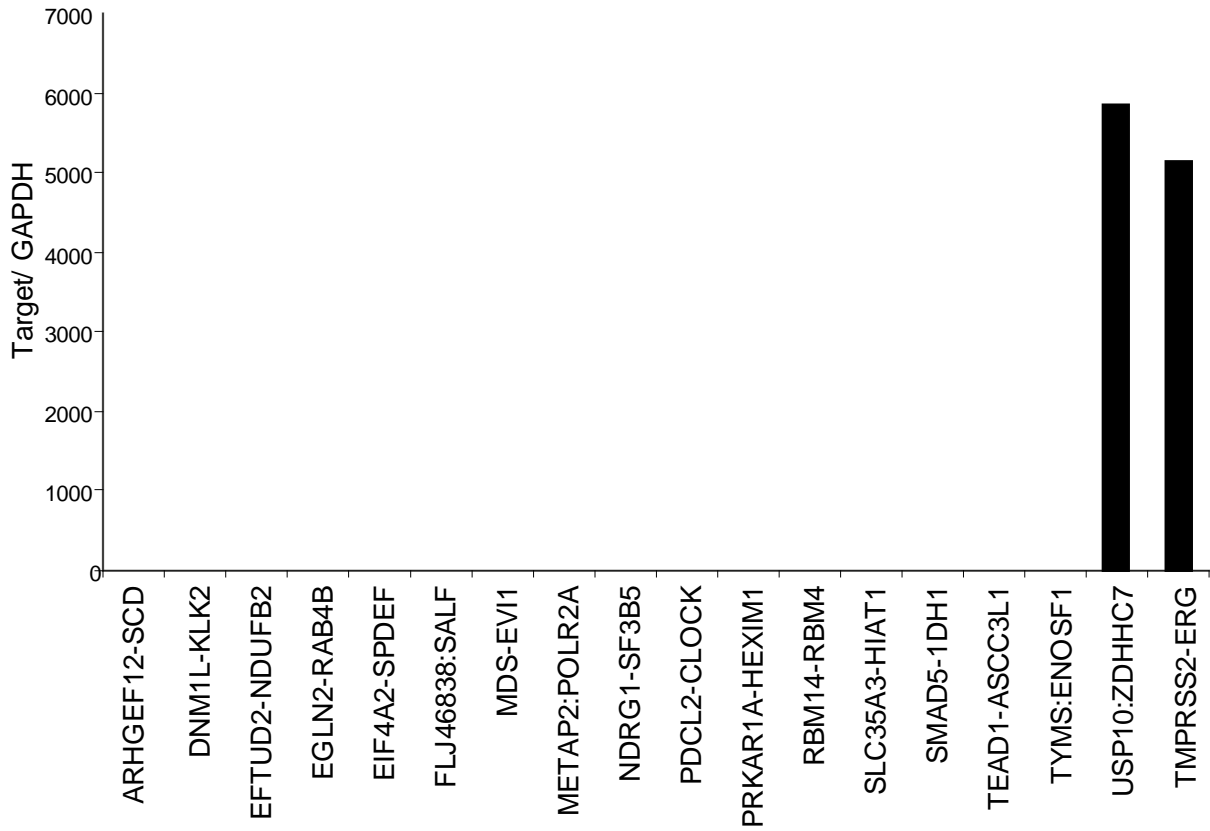

**Supplemental Figure 3: Fusion-chimeras nominated by long read sequences that failed validation by qRT-PCR.** *TMPRSS2-ERG* and *USP10-ZDHHC7* were the only two chimeras validated in this set of eighteen candidates in VCaP cells.

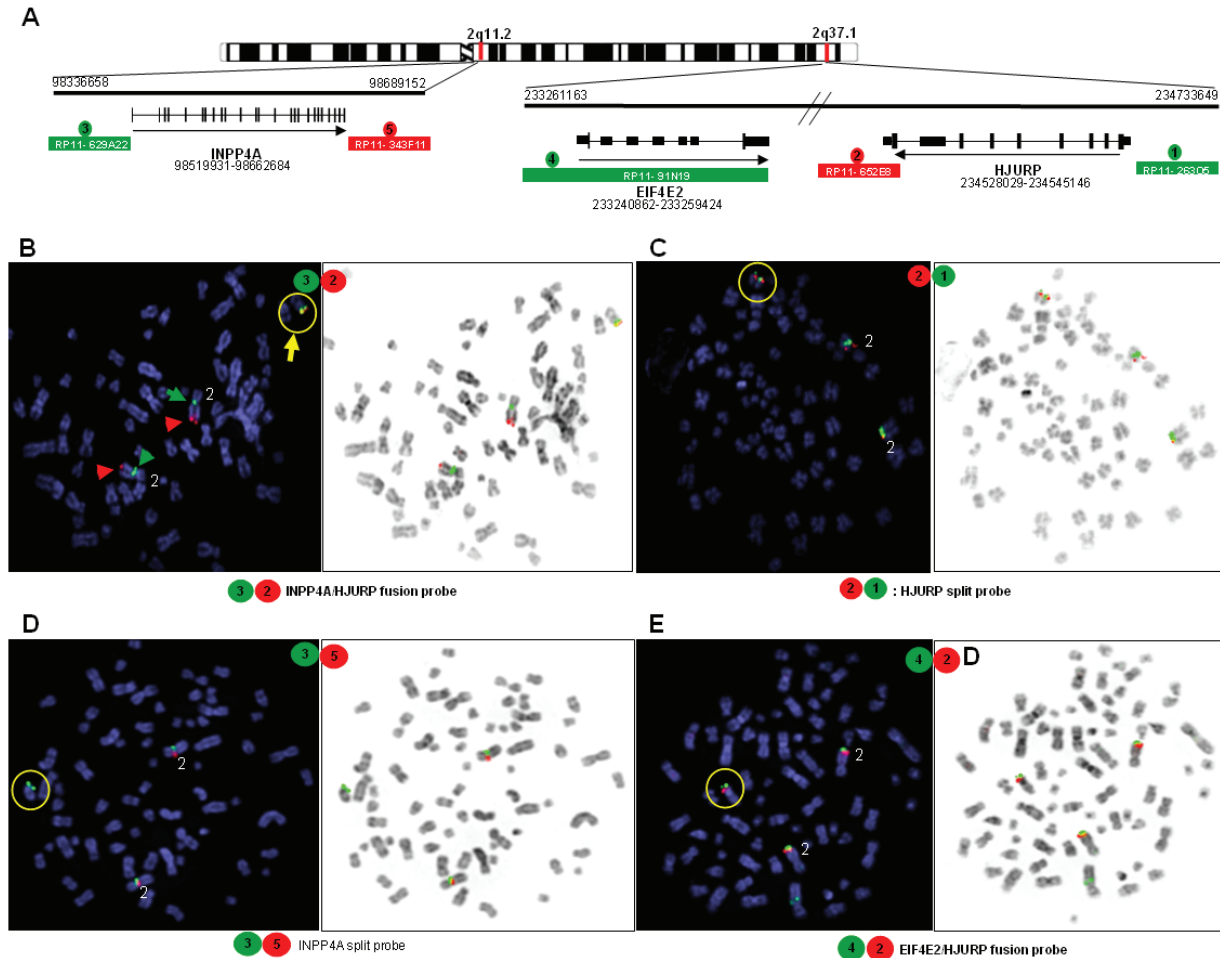

**Supplemental Figure 4: FISH analysis of the chromosomal rearrangements at 2q11 and 2q37, involving *INPP4A*, *EIF4E2* and *HJURP* genes.** **a**, Schematic showing genomic organization of *INPP4A*, *EIF4E2* and *HJURP* genes. Horizontal red and green bars indicate the location of BAC clones. **b**, FISH analysis using BAC clones 2 and 3 showing the fusion of *INPP4A* and *HJURP* genes on a marker chromosome (yellow circle). Green and red arrow indicate the hybridization of 5' *INPP4A* probe at 2q11 and 3' *HJURP* probe at 2q37, respectively, on two copies of normal chromosome 2. **c**, Hybridization of *HJURP* probe to two normal copies of chromosome 2 and on the marker chromosome (yellow circle) suggest a breakpoint between *EIF4E2* and *HJURP* genes resulting in translocation of 3' end of chromosome 2q onto the marker chromosome. **d**, Hybridization of probes 2 and 4 onto two normal chromosome 2, marker chromosome (yellow circle) and a split green signal on the derivate chromosome 2 (confirming a breakpoint within probes 2 and 4 resulting in an insertion into the marker chromosome). **e**, Rearrangement of *INPP4A* gene confirmed by the presence of probe 3 on the marker chromosomes (yellow circle) in addition to the co-localizing signal on two copies of normal chromosome 2.

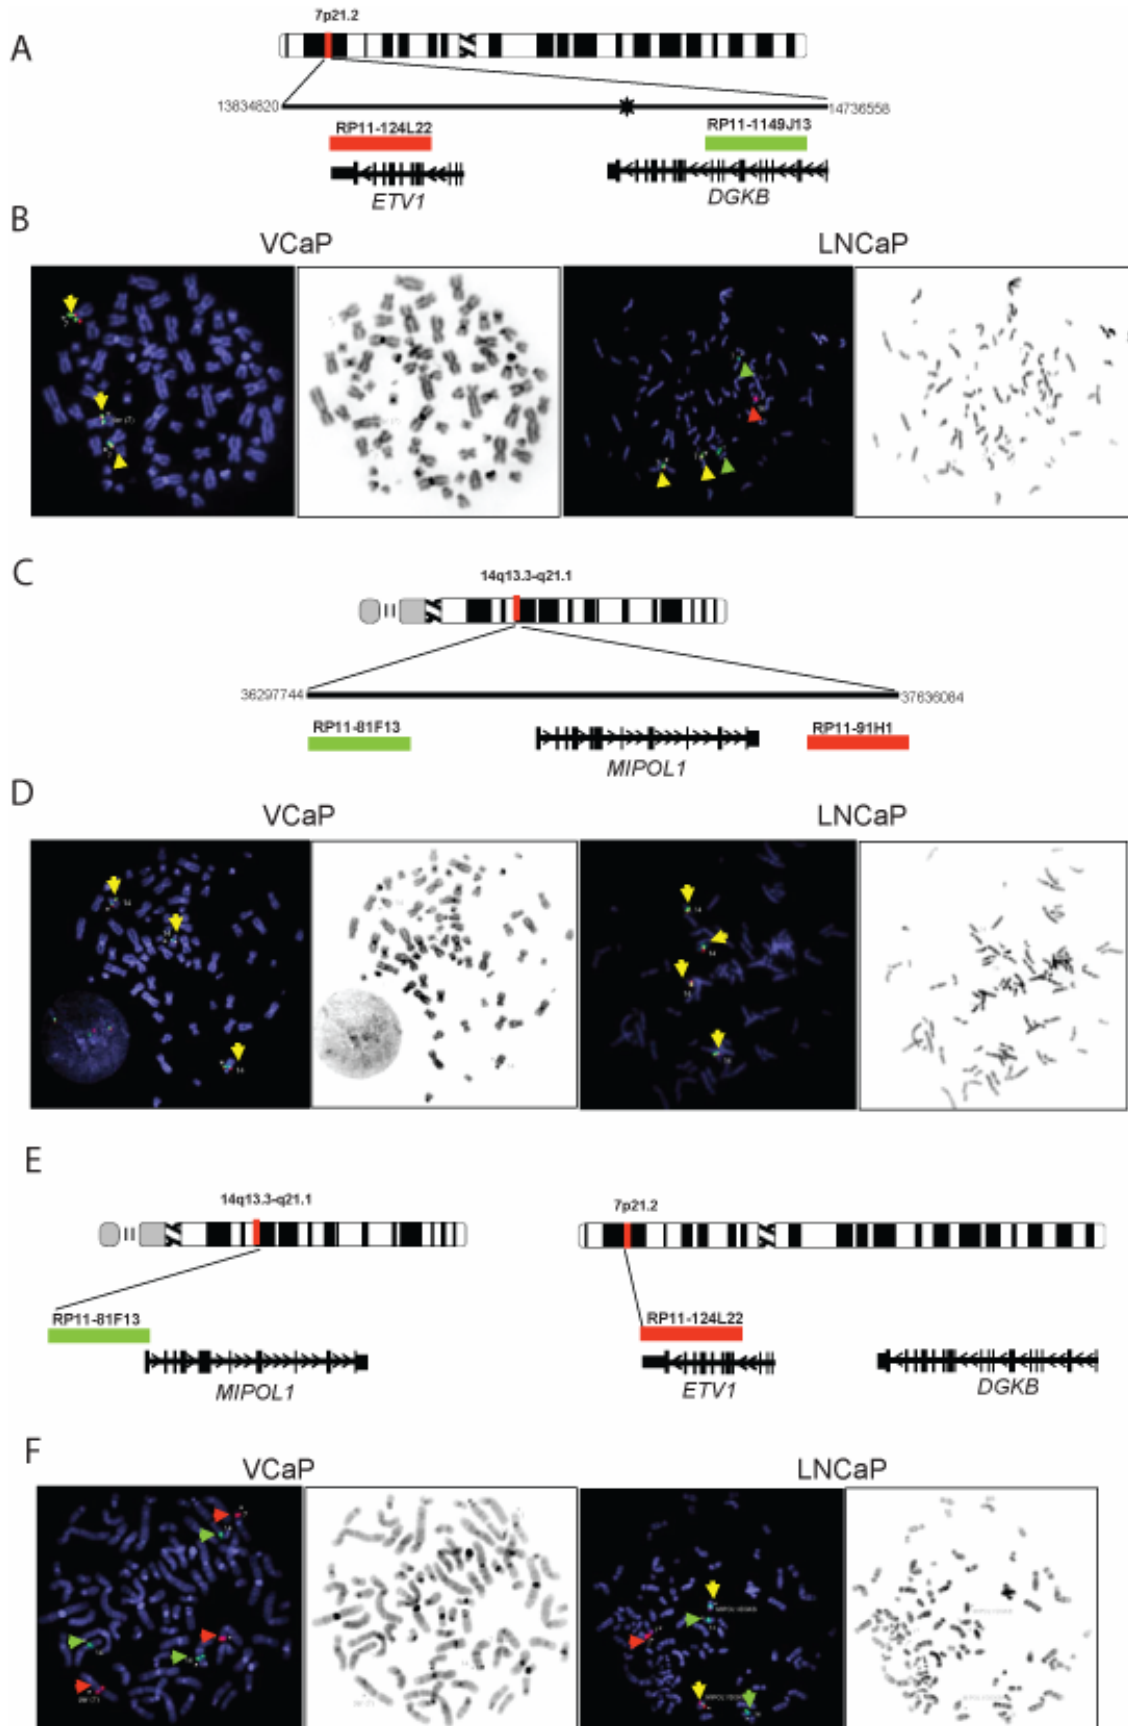



**Supplemental Figure 5: FISH analysis of the chromosomal rearrangements involving *MIPOL1*, *DGKB*, and *ETV1*.** **a**, Schematic of the genomic organization of *ETV1* and *DGKB* locus on chromosome 7p21.2. Gene orientation is indicated by arrows. Previously identified genomic breakpoint in *DGKB* is marked with a star. FISH analysis was performed using BAC clones on VCaP and LNCaP cells. Probe locations encompassing both *ETV1* and *DGKB* are indicated with horizontal red and green bars, respectively. Genomic coordinates indicate the region spanning the two BAC clones. **b**, Co-localized signals (normal) are indicated by yellow arrows and red and green arrowheads indicate the split signal. Split signals are observed only in LNCaP cells. The rearranged signal (red) was observed on chromosome 14. **c**, Schematic diagram showing genomic organization of *MIPOL1* locus on chromosome 14q13.3-q21.1, **d**, FISH analysis did not reveal split signals in LNCaP or VCaP cells. **e**, Genomic organization of *MIPOL1*, *ETV1*, and *DGKB* gene locus on chromosomes 7p21.2 and 14q13.3-q21.1, respectively. BAC clones from the 3' end of *ETV1* (red bar) and the 5' end of *MIPOL1* (green bar) were employed to detect co-localization of *ETV1* downstream of *MIPOL1*. **f**, FISH analysis shows co-localization of in LNCaP but not VCaP cells.

a

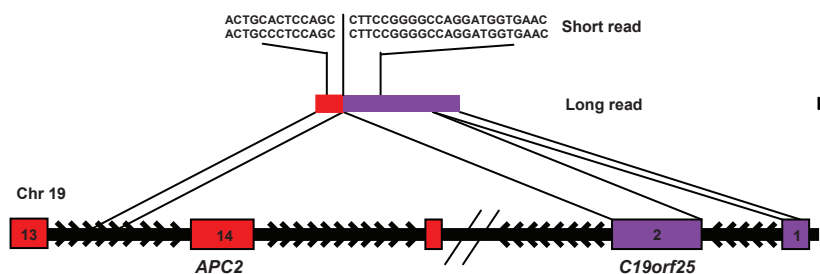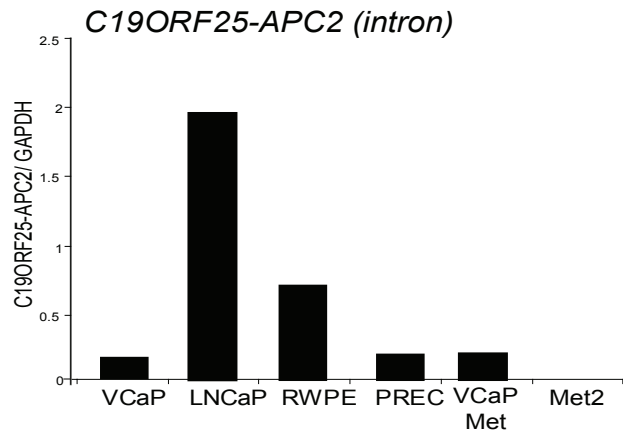

b

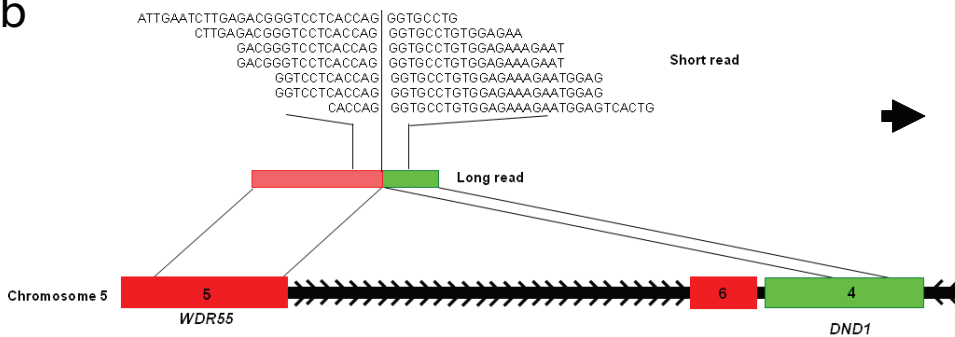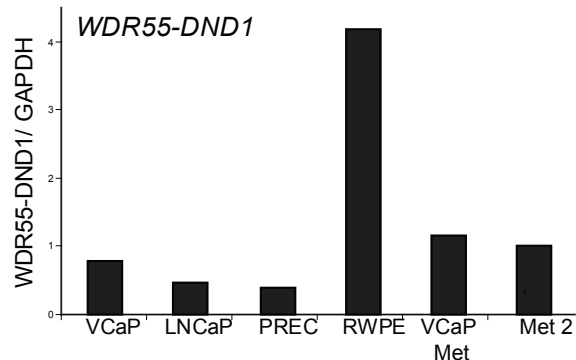

c

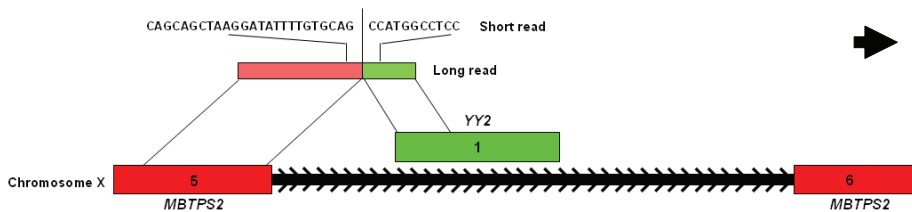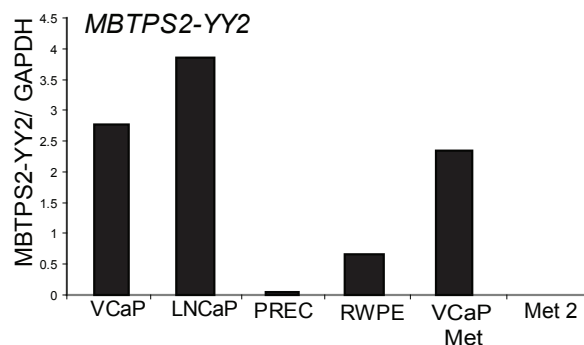

d

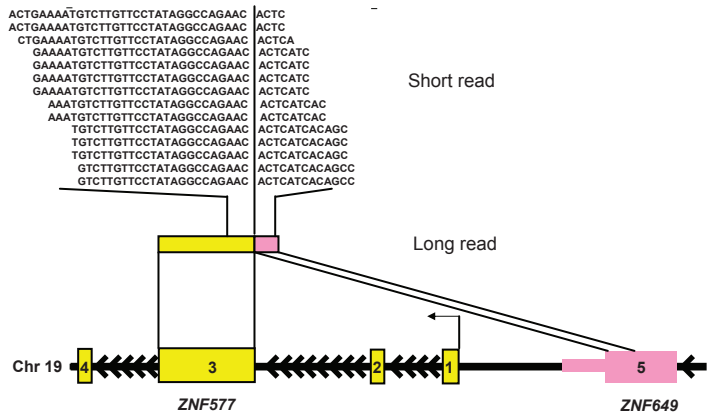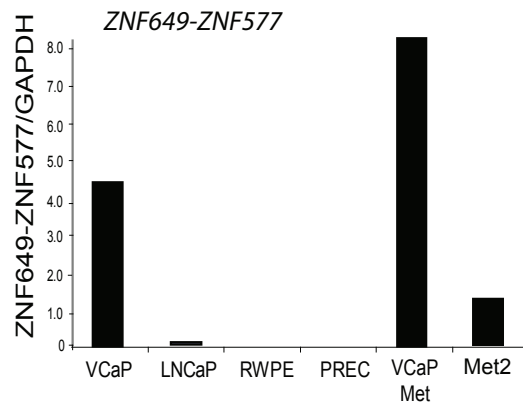

**Supplemental Figure 6: Chimeric Class V, Read-through fusions.** Schematics of the read-through fusions accompanied with qRT-PCR validations of the fusion transcripts in prostate cancer cell lines VCaP and LNCaP, metastatic prostate tissues VCaP-met and Met 2, and benign prostate cell lines, RWPE and PREC, **a**, *C19orf25-APC2* (intron), **b**, *WDR55-DND1*, **c**, *MBTPS2-YY2*, and **d**, *ZNF649-ZNF577*.

**a**

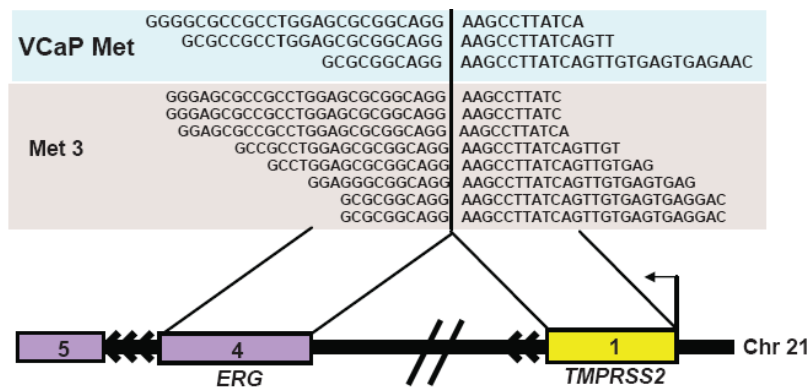

**b**

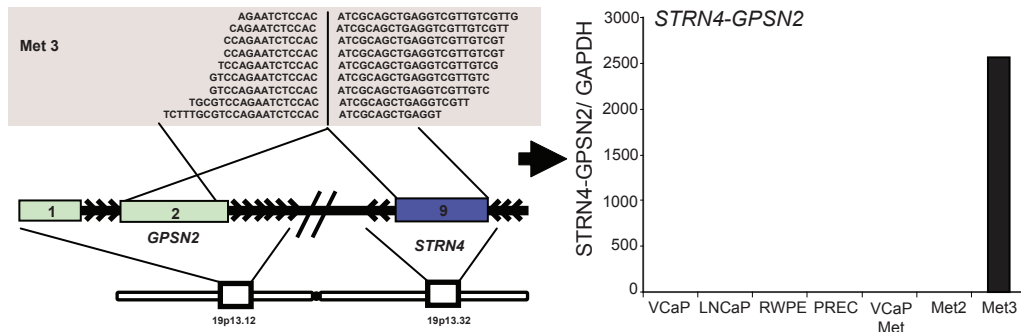

**c**

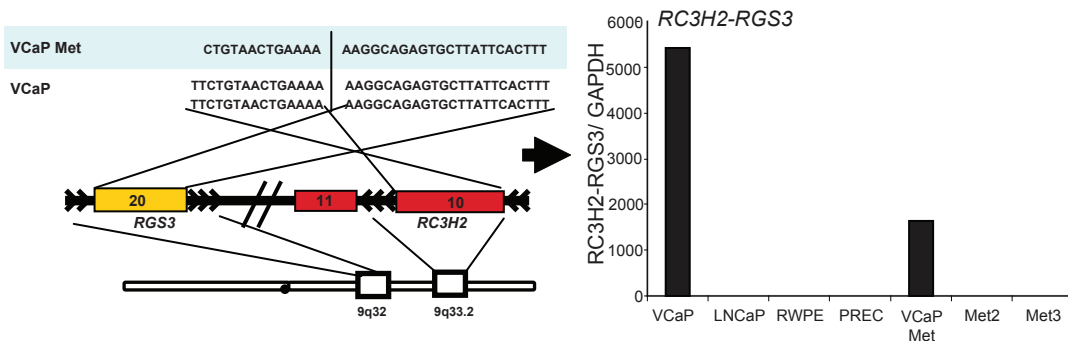

**d**

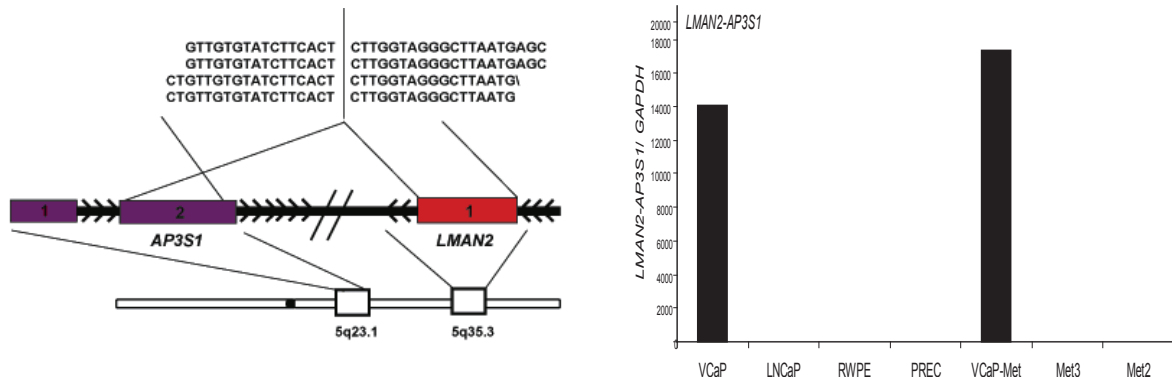

**Supplemental Figure 7: Chimera candidates in prostate tissues.** **a**, Schematic of *TMPRSS2-ERG* fusion boundary populated with short reads sequenced in both VCaP-Met (light blue) and Met 3 (gray) tissues. **b**, Schematic of the *STRN4-GPSN2* fusion on chromosome 19 in the metastatic prostate cancer tissue, Met 3. The 5' portion of *STRN4* (purple) is fused with exon 2 of *GPSN2* (green), which resides in the opposite orientation on the same chromosome. **c**, Schematic of *RC3H2-RGS3* fusion on chromosome 9 in metastatic prostate cancer tissue, VCaP-Met. The 5' portion of *RC3H2* (red) is fused with exon 20 of *RGS3* (yellow), which resides in the opposite orientation on the same chromosome. **d**, Schematic of the complex intra-chromosomal gene fusion between exon 1 of lectin, mannose-binding 2 (*LMAN2*) and exon 2 of adaptor-related protein complex 3, subunit 1 (*AP3S1*). qRT-PCR validation of *LMAN2-AP3S1* fusion transcript expression in prostate cancer cell line, VCaP and metastatic prostate tissue, VCaP-Met.

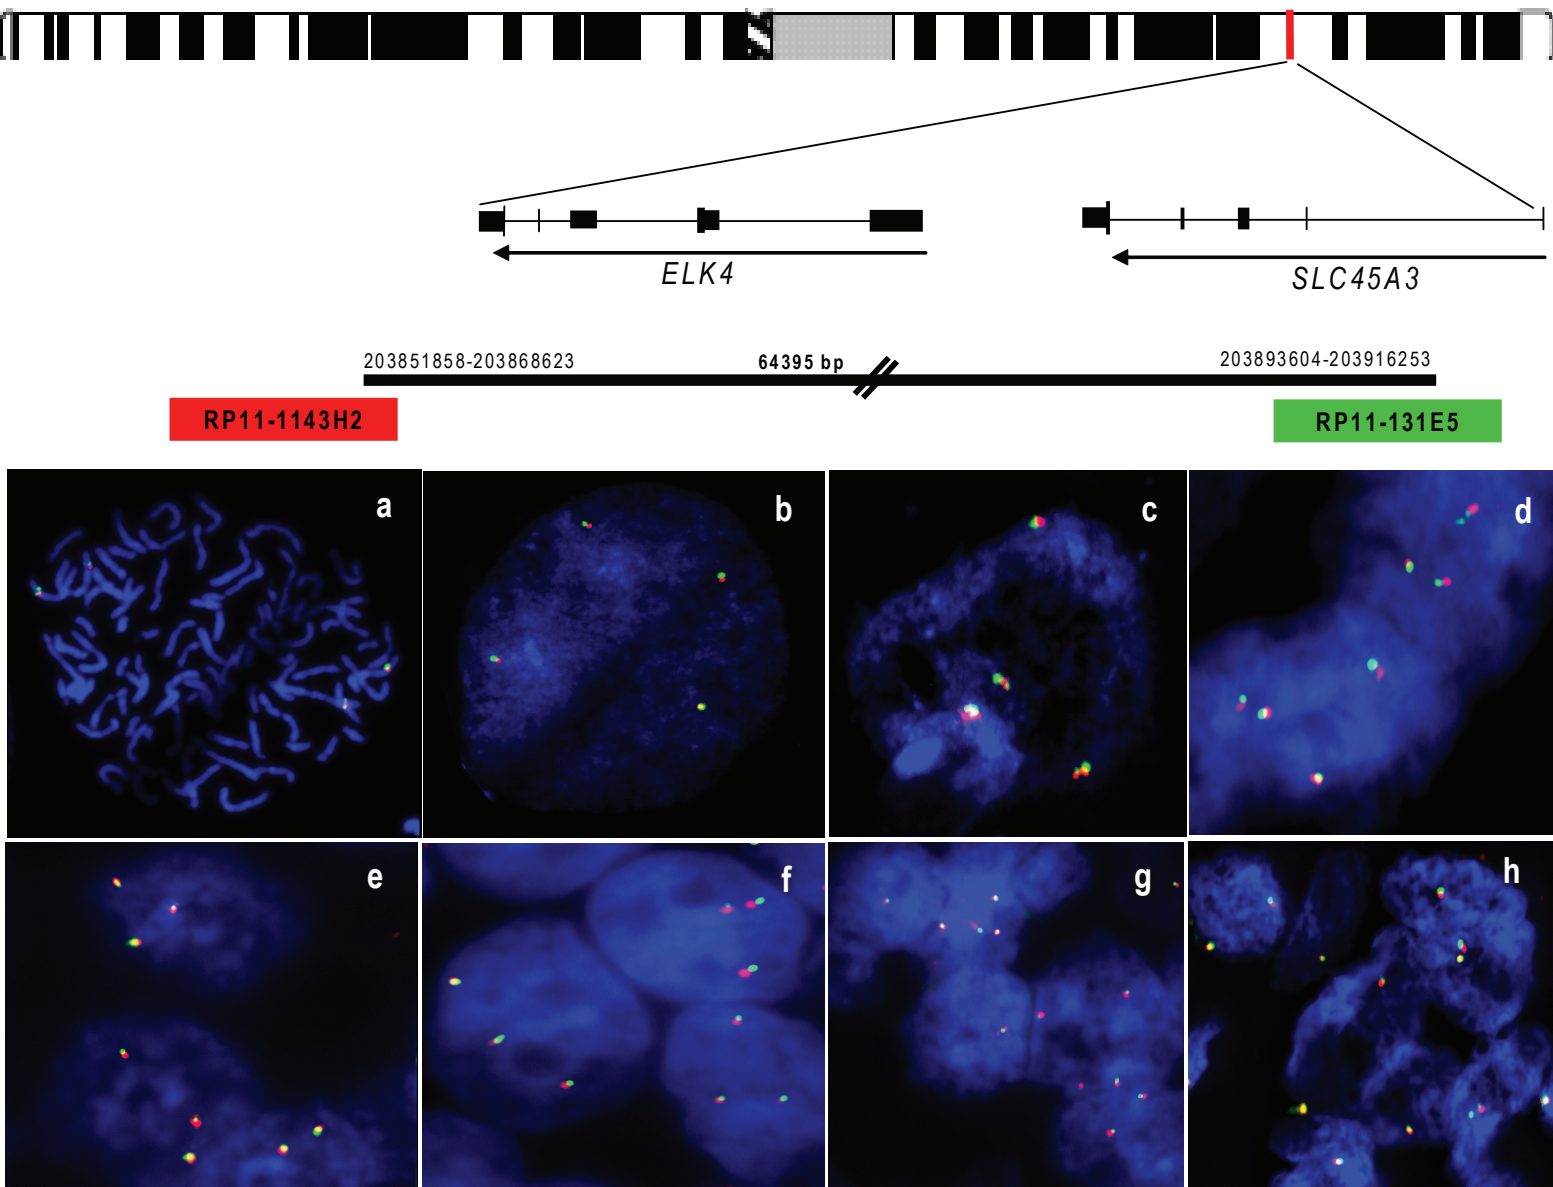

**Supplemental Figure 8: Lack of rearrangement of the *SLC45A3-ELK4* locus in prostate cancers that express the *SLC45A3-ELK4* mRNA chimera.** Fluorescence in situ hybridization analysis of the *ELK4* gene for rearrangement. Schematic diagram (top panel) shows the genomic organization of the *SLC45A3* and *ELK4* genes on chromosome 1q32.1. BAC clones (red and green horizontal bars with BAC clone ID) were derived from the immediately flanking 3' and 5' regions of *ELK4* and *SLC45A3* genes, respectively. Probes were hybridized on the *SLC45A3-ELK4* chimera positive cell line LNCaP (a, metaphase spread; b, interphase), and 5 index prostate tumors that express the mRNA chimera (a, e, f, g & h). c, DU145 is a *SLC45A3-ELK4* chimera negative prostate cancer cell line. All the samples show co-localization of red and green signals indicating the absence of gross rearrangement or large deletions within the genes.

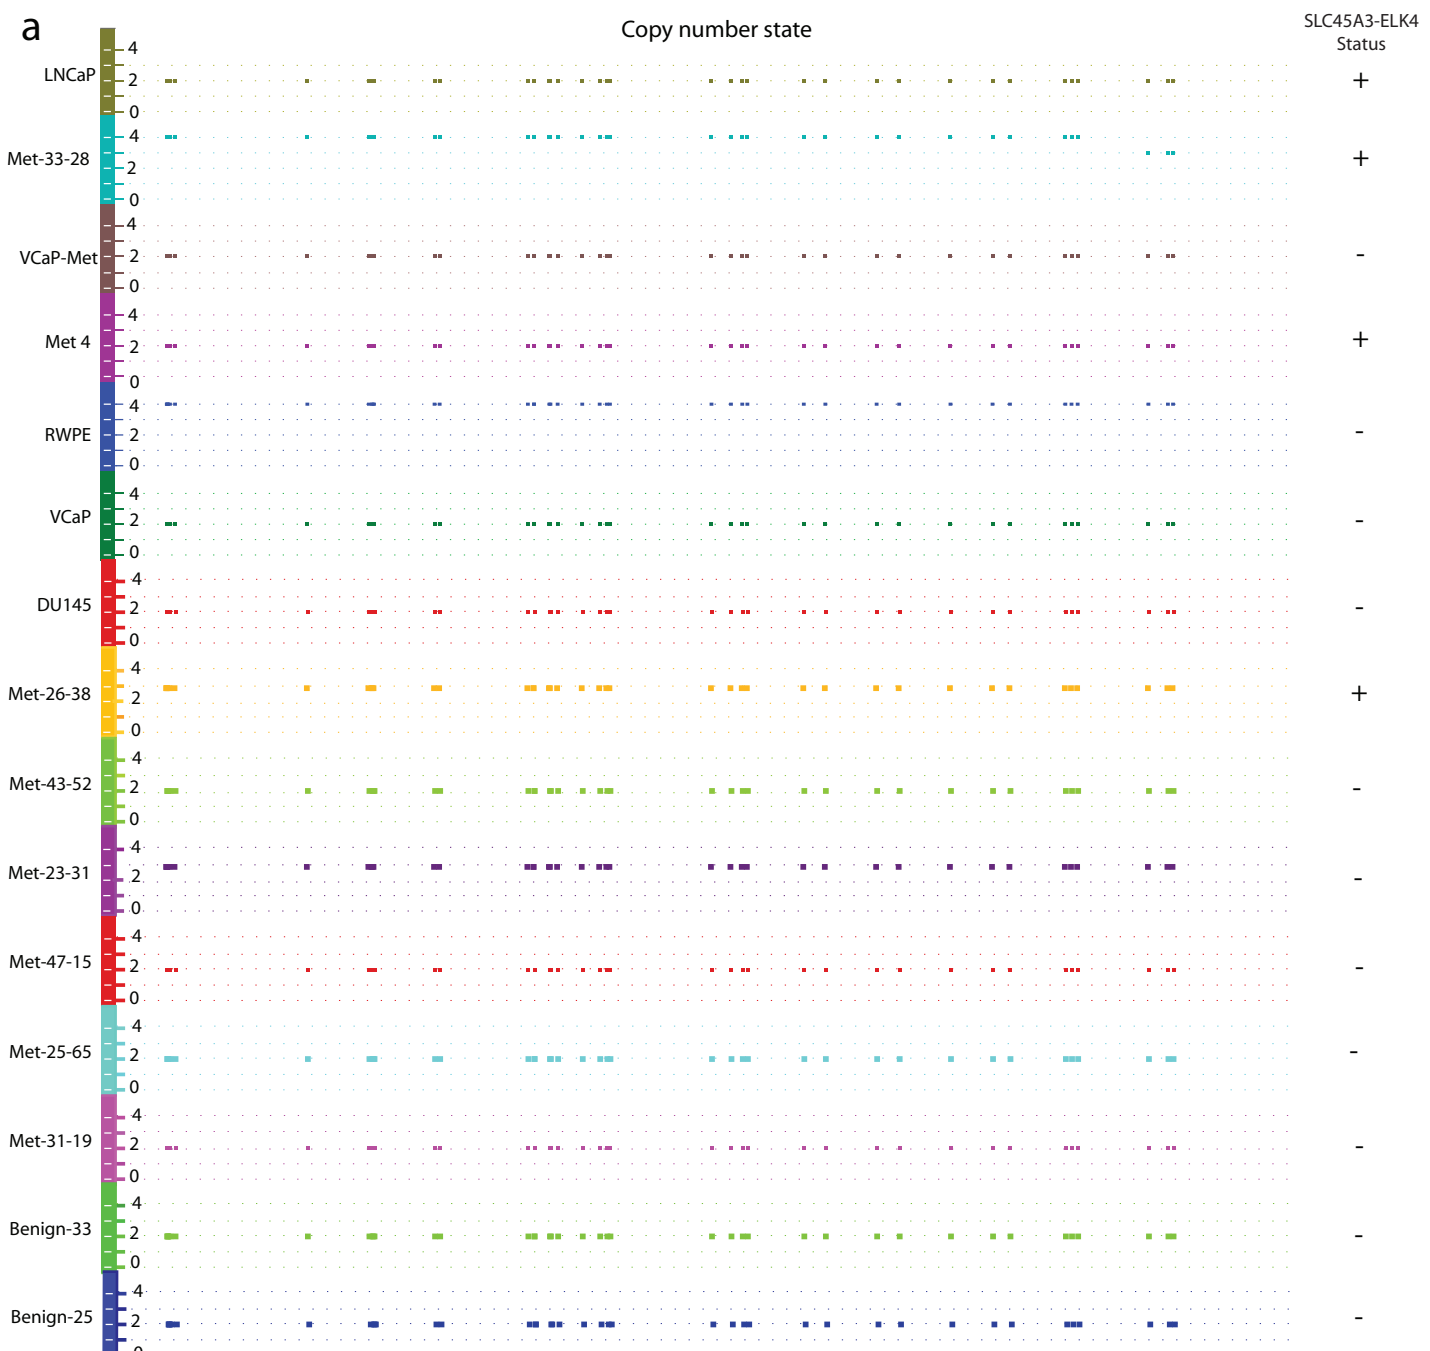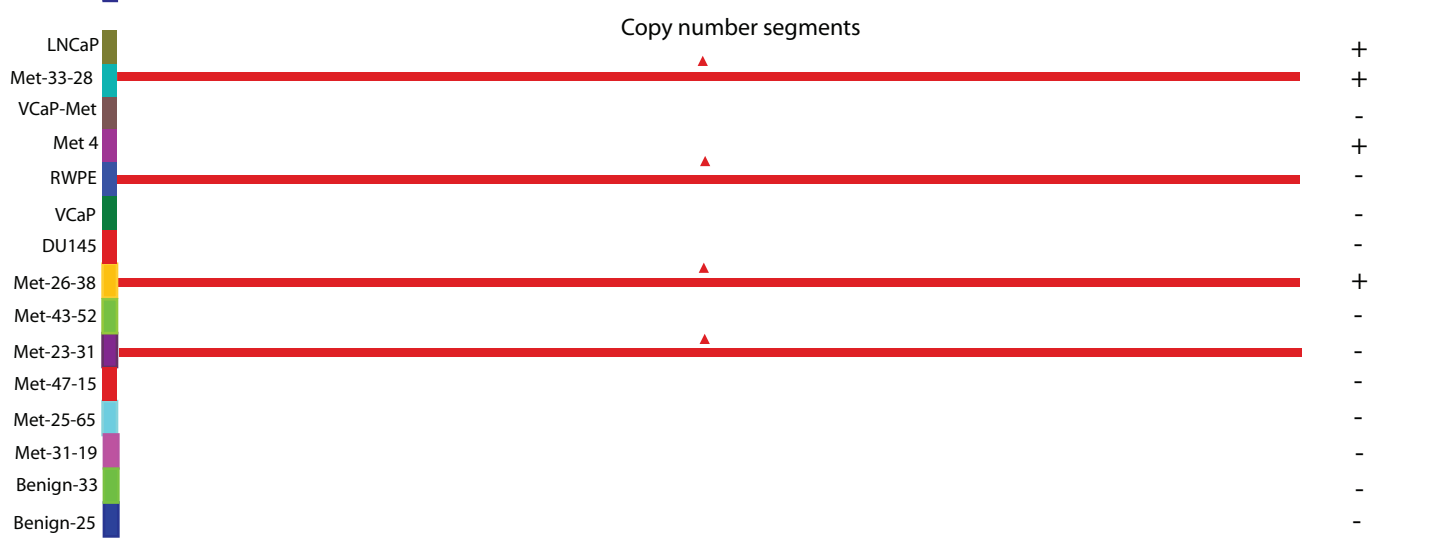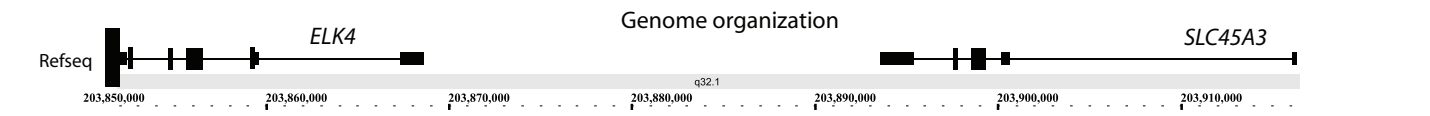

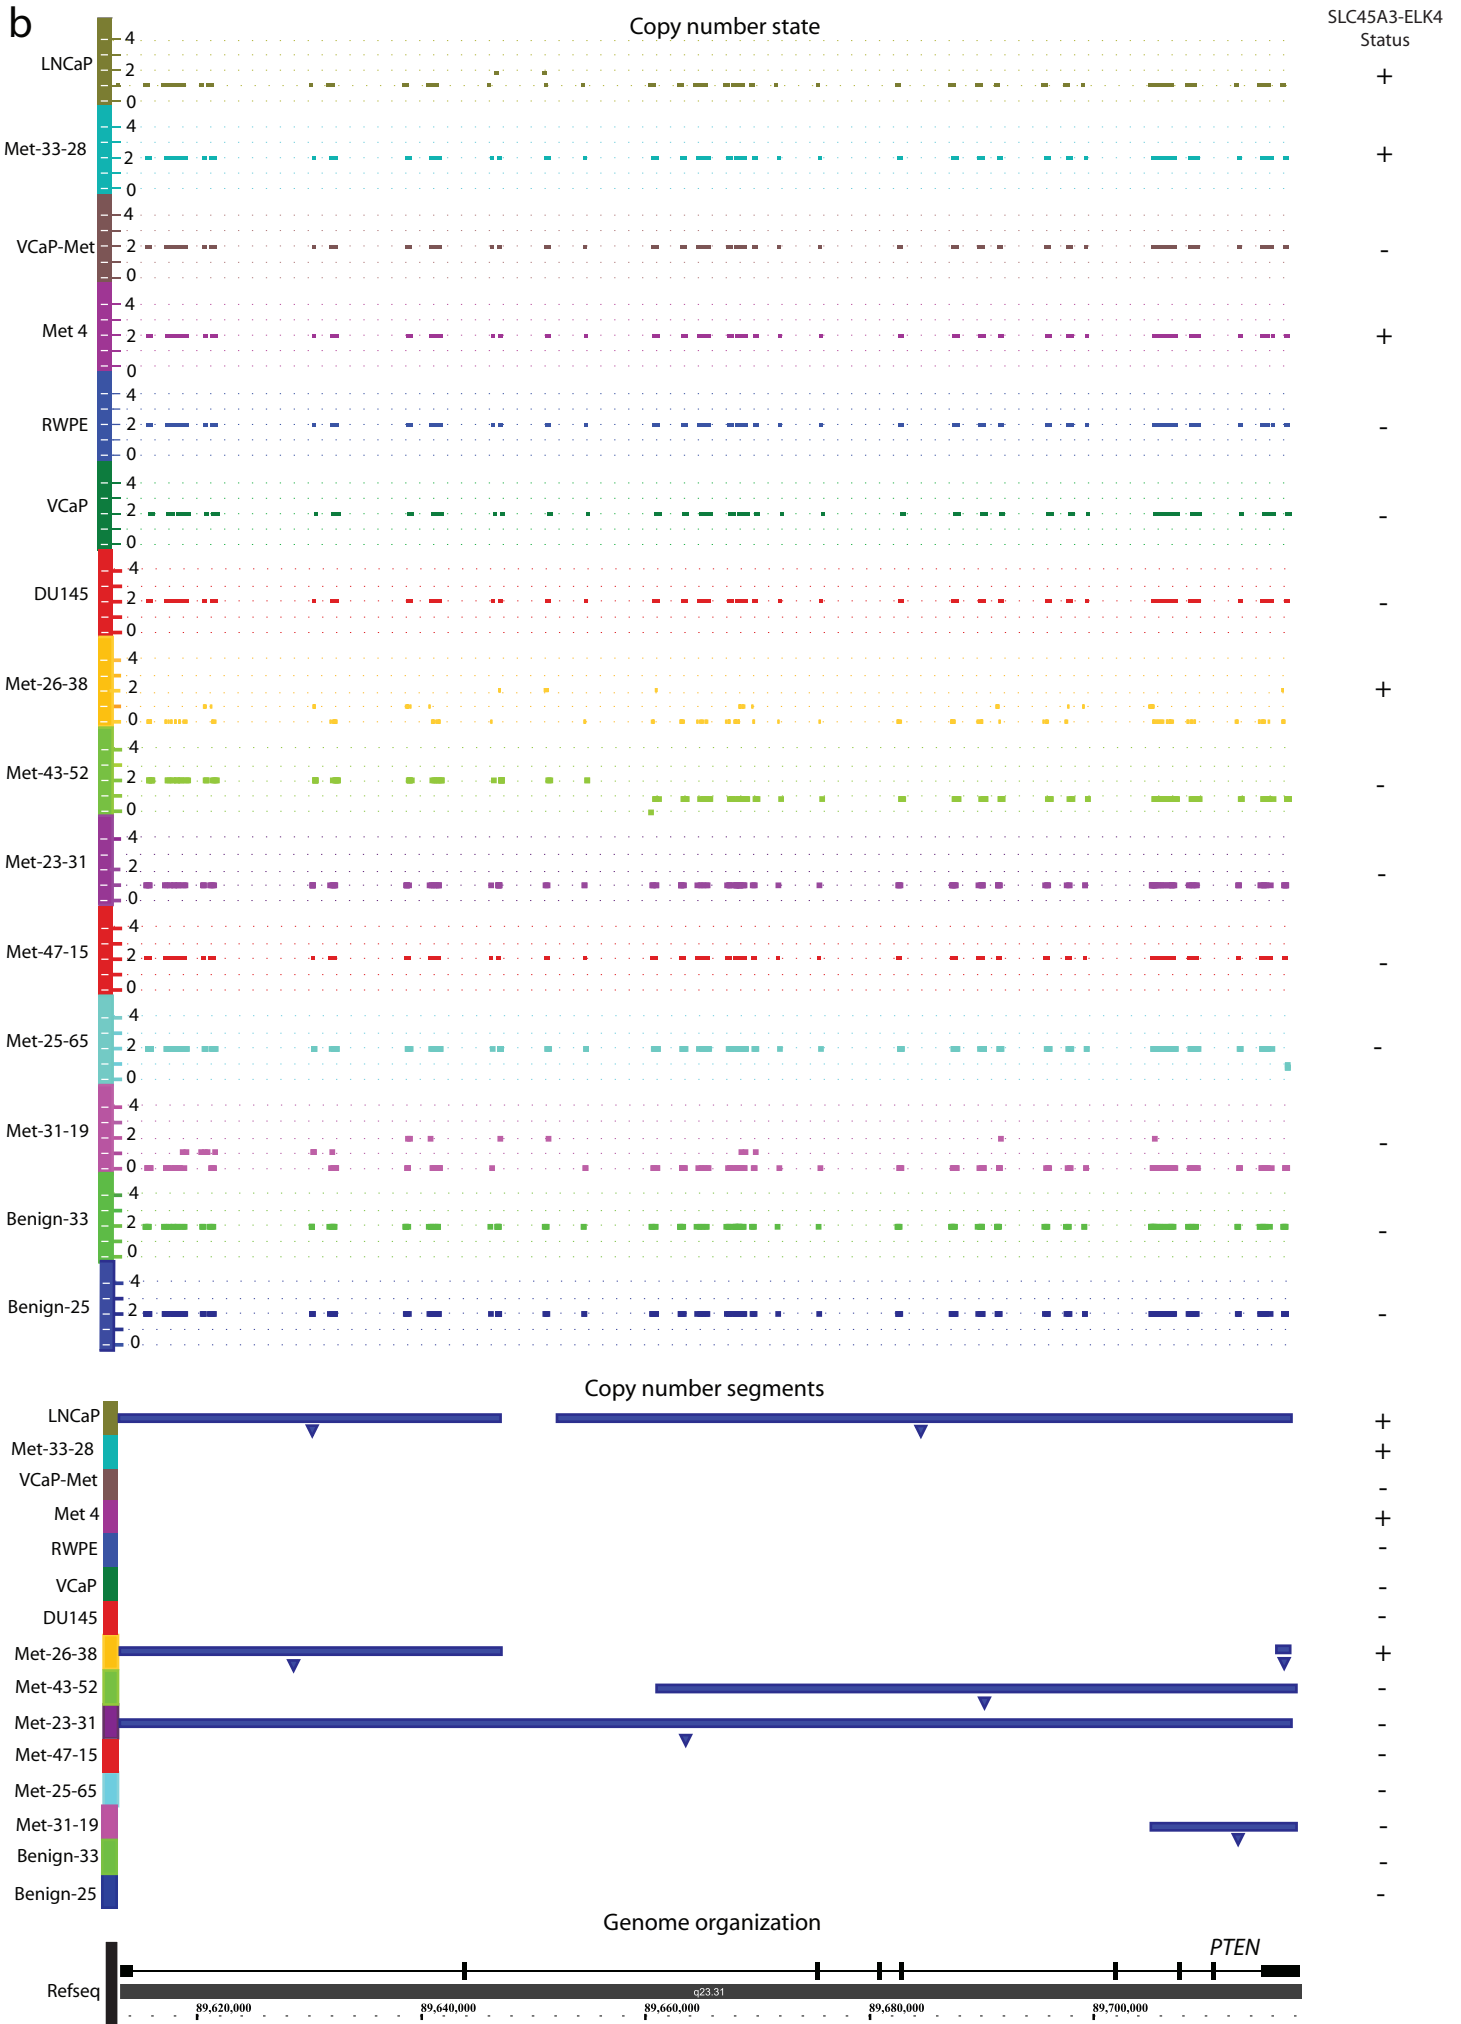

**Supplemental Figure 9: Genomic level analysis, using Affymetrix SNP 6.0, of 15 samples using the Genotyping Console software.** Copy number states are divided into the following categories: 0 - homozygous deletion; 1 - heterozygous deletion; 2 - normal diploid; 3 - single copy gain; and 4 - multiple copy gain. Copy number segments highlight both amplified (red) and deleted (blue) genomic segments. Genome organization shows the genomic aberrations relative to **(a)** *SLC45A3-ELK4* and **(b)** *PTEN*. For each sample, the *SLC45A3-ELK4* status is shown on the right using '+' and '-'. Overall, we did not observe a genomic deletion within the *SLC45A3-ELK4* region. As a positive control, we have demonstrated the ability of our SNP array analysis to detect the *PTEN* loss in multiple samples. While the *SLC45A3-ELK4* region lacked a deletion, multiple samples (which are not correlated with *SLC45A3-ELK4* status) show a copy number gain.



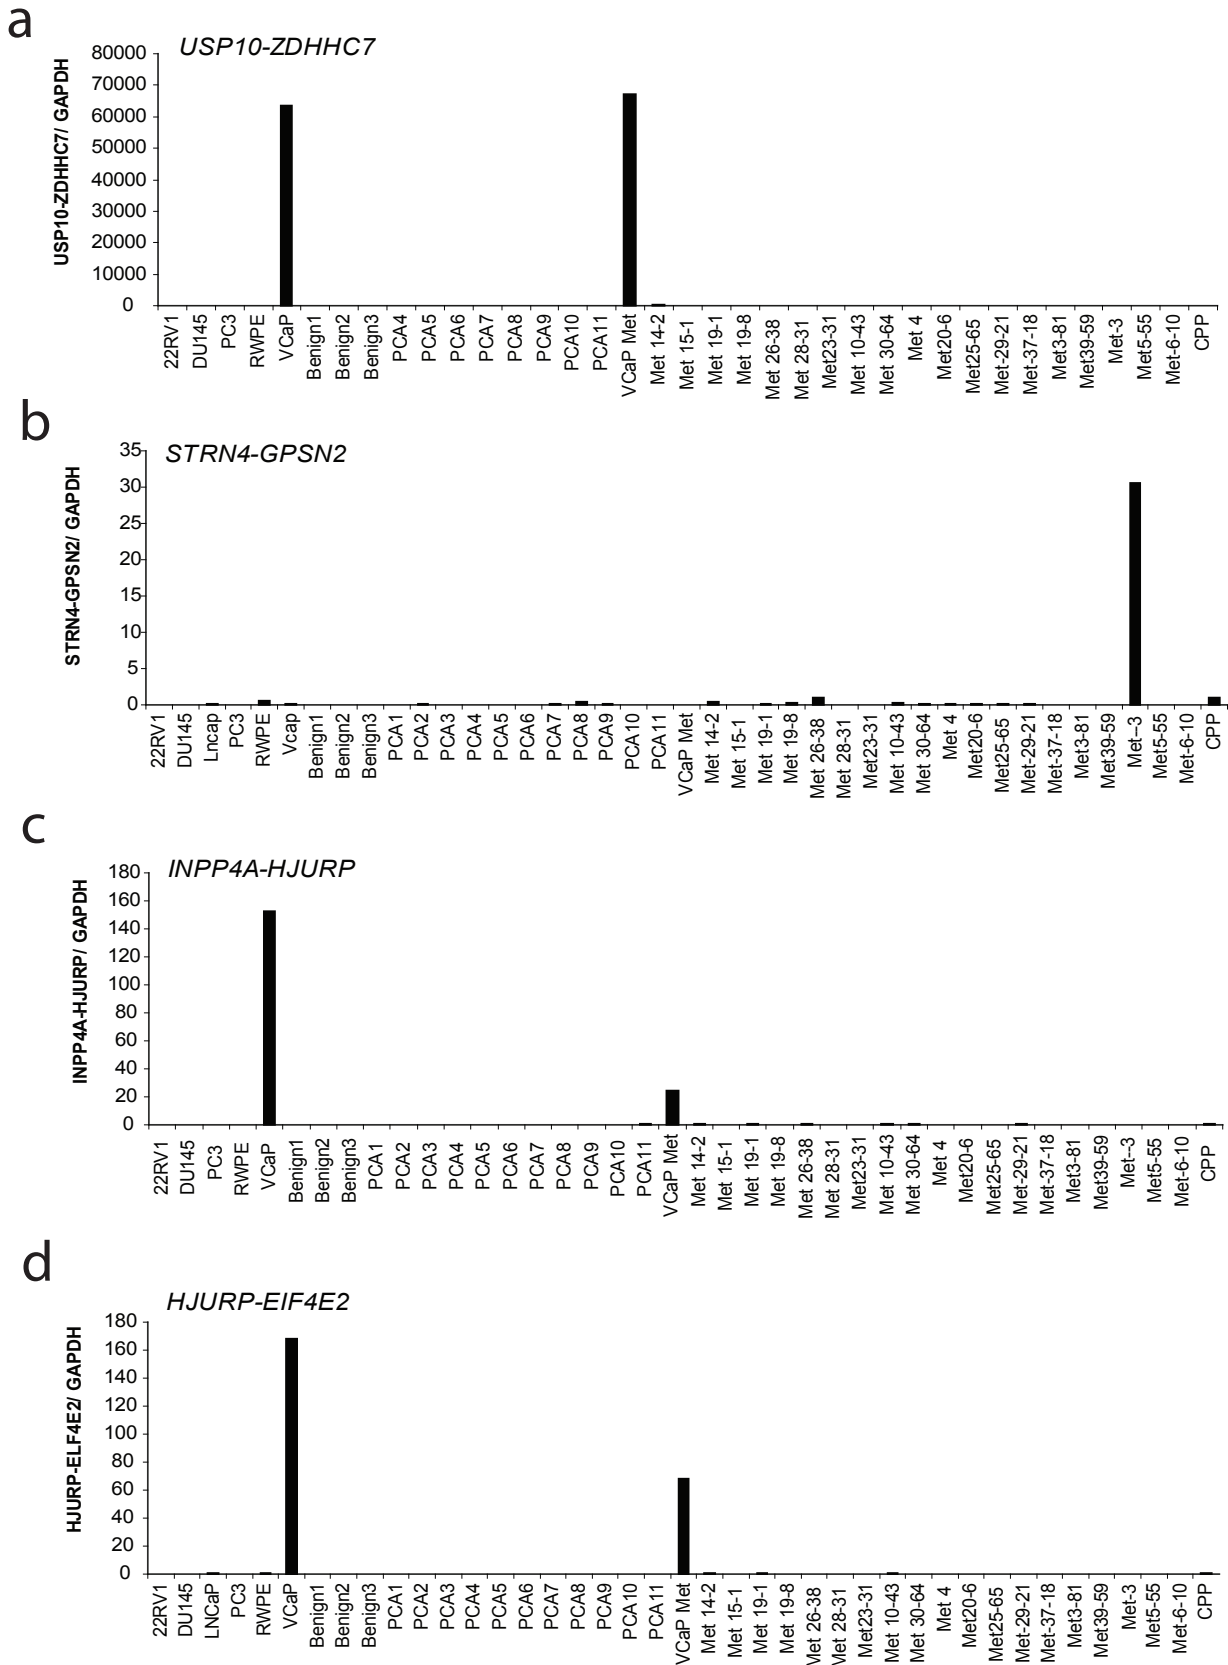

**Supplemental Figure 10: qRT-PCR based survey of a panel of prostate cancer cell lines and tissues- benign, localized prostate cancer, and metastatic tissues for recurrence. *USP10-ZDHHHC7* (a), *INPP4A-HJURP* (c), and *HJURP-EIF4E2* (d) all show expression in VCaP and VCaP-Met, as expected, and were not confirmed in any other samples from the panel. (b) *STRN4-GPSN2* expression is confirmed in Met 3 but does not appear to be expressed in any other sample tested.**

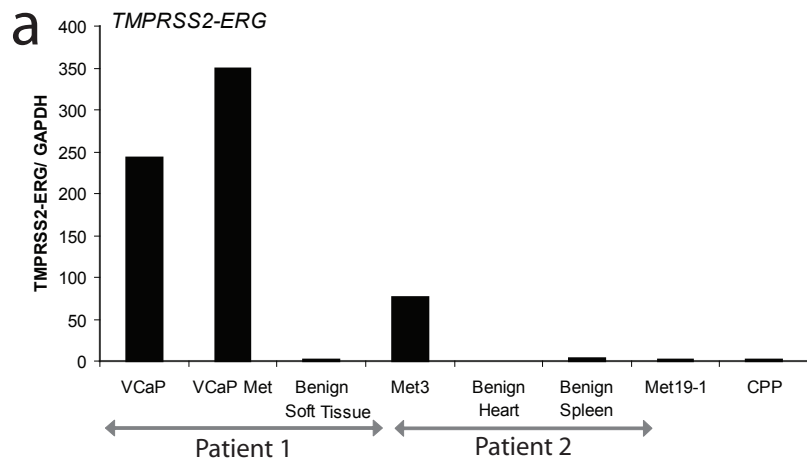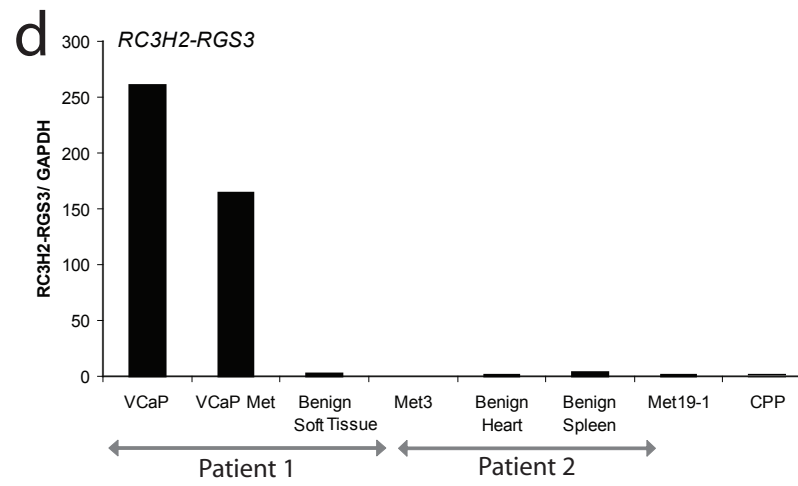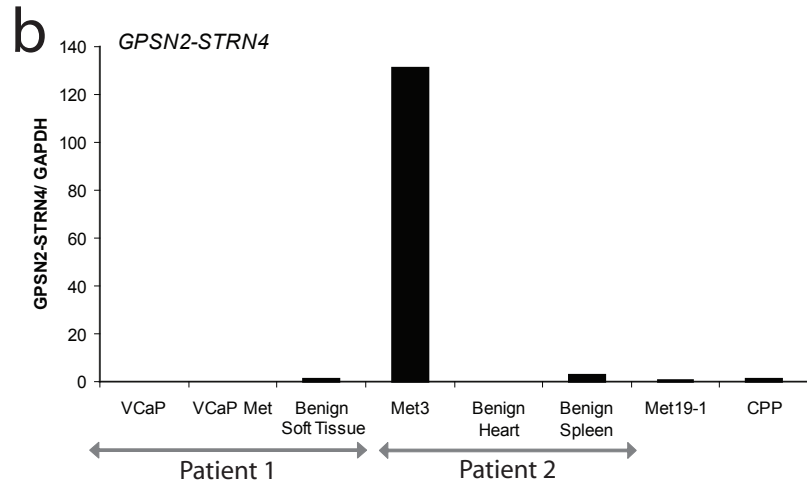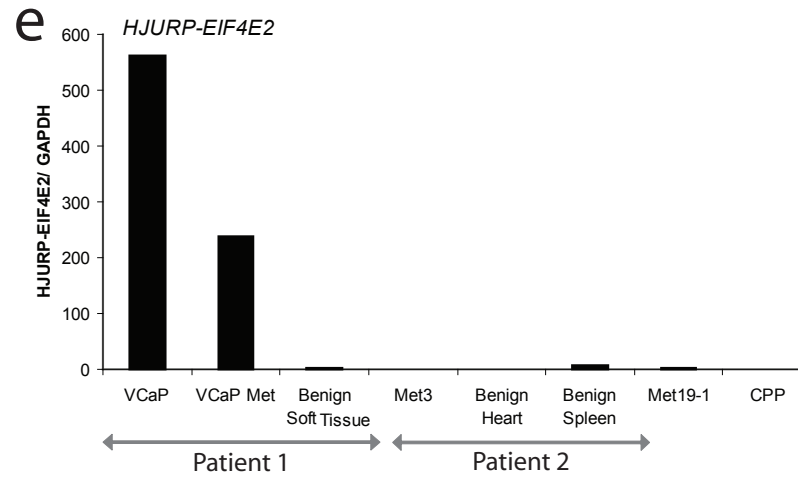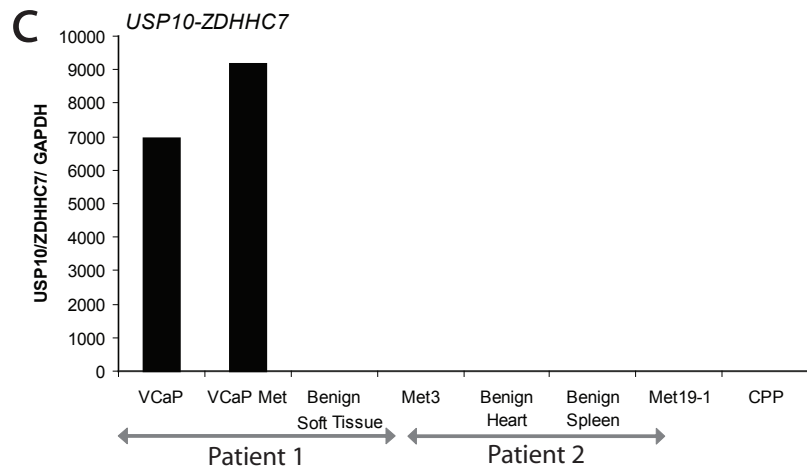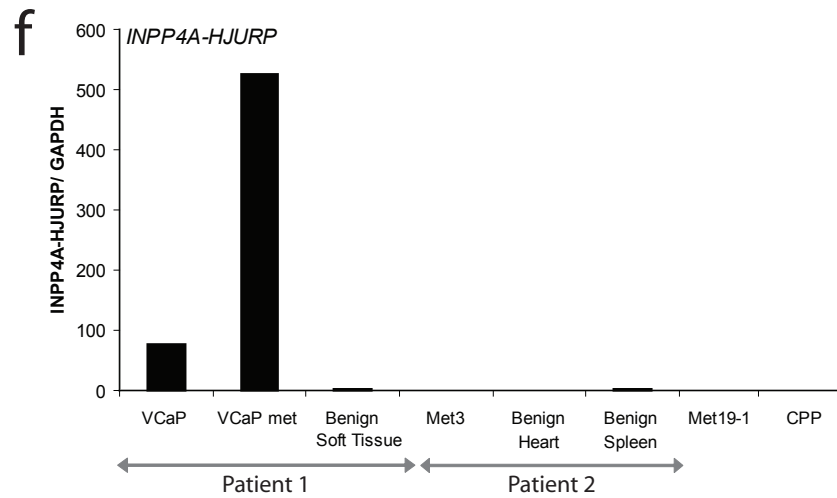

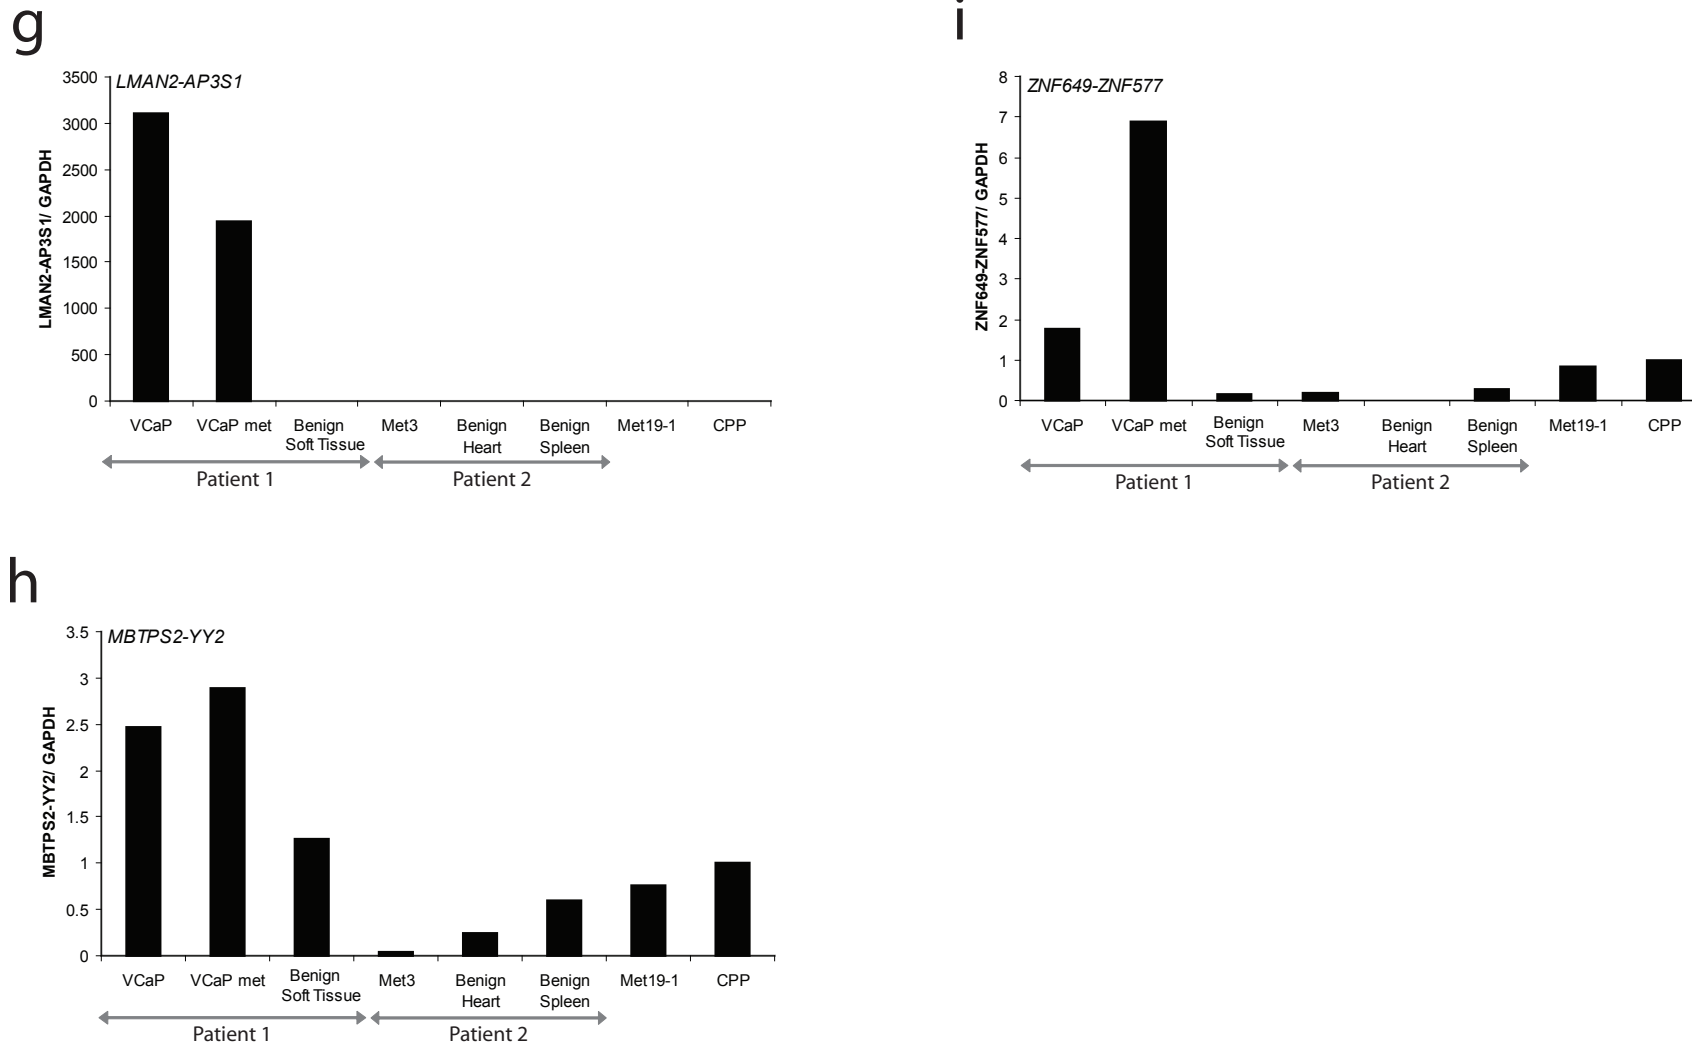

**Supplemental Figure 11: qRT-PCR based confirmation of fusion transcript expression restricted to prostate cancer samples and absent in somatic tissues from the same patient.** Five fusion genes, *TMPRSS2-ERG* (a), *GPSN2-STRN4* (b), *USP10-ZDHHC7* (c), *RC3H2-RGS3* (d), *HJURP-EIF4E2* (e), *INPP4A-HJURP* (f), *LMAN2-AP3S1* (g), *MBTPS2-YY2* (h), and *ZNF649-ZNF577* (i) were tested in two patients, Patient 1 and Patient 2.

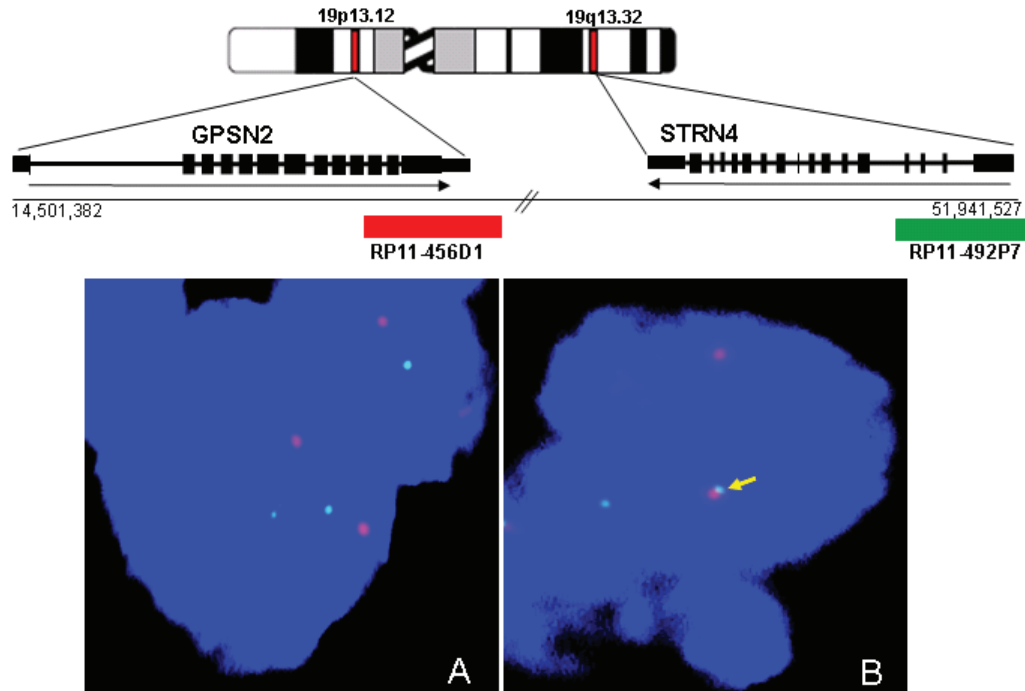

**Supplemental Figure 12: FISH analysis of the chromosomal rearrangements involving *STRN4-GPSN2* gene fusion in tumor sample MET3.** Top panel show the genomic organization of the *GSPN2* and *STRN4* genes located on chromosome 19. The red and green horizontal bars indicate the relative position of the BAC clones. Normal signal patterns were observed in benign sample (a) whereas a co-localizing red and green (yellow arrow) signal indicates a gene fusion in tumor sample only (b).

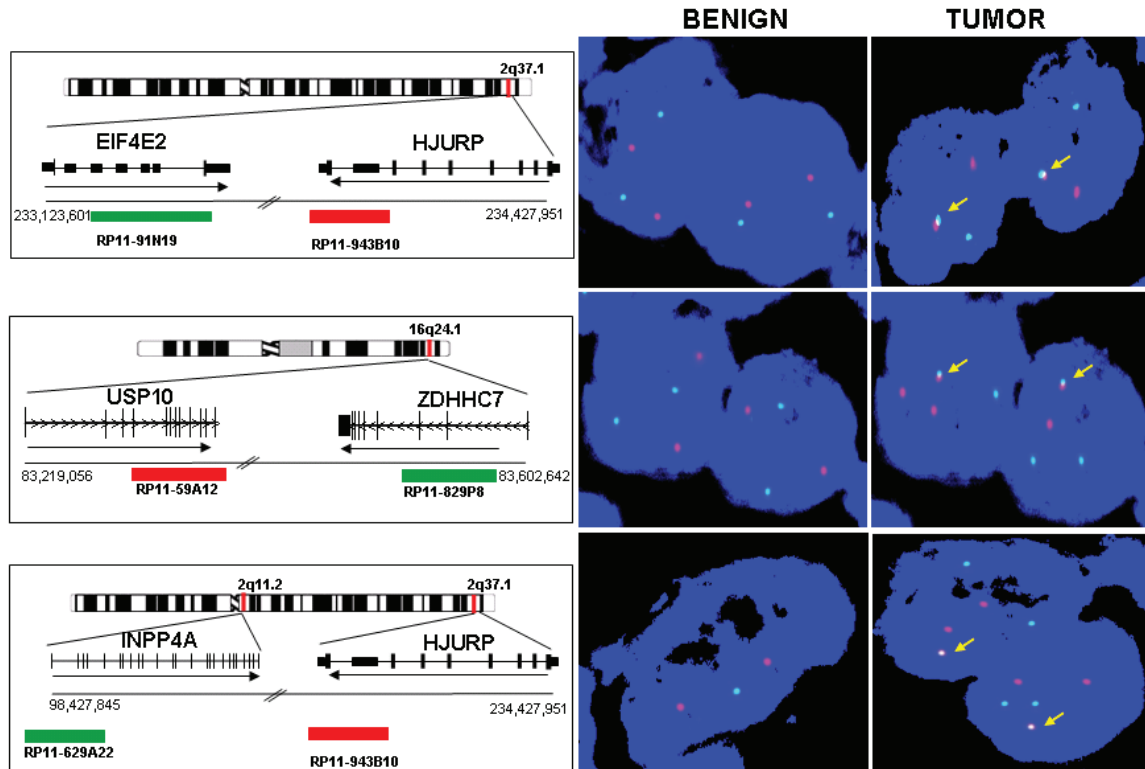

**Supplemental Figure 13: FISH analysis of the chromosomal rearrangements involving *EIF4E2-HJURP*, *USP10-ZDHHC7*, and *INPP4A-HJURP* gene fusions in tumor and paired normal tissues from VCaP-Met.** Schematic diagrams on the left panel show the genomic organization of the genes on their respective chromosomes. The green and red horizontal bars indicate the relative position of the BAC clones. The black arrows indicate the orientation of the genes in the chromosome. The probes were tested on both tumor and paired normal tissues. Individual red and green signals indicate the signal on the normal chromosomes. The co-localizing red and green (yellow arrows) signals indicate fusion, in tumor samples only.

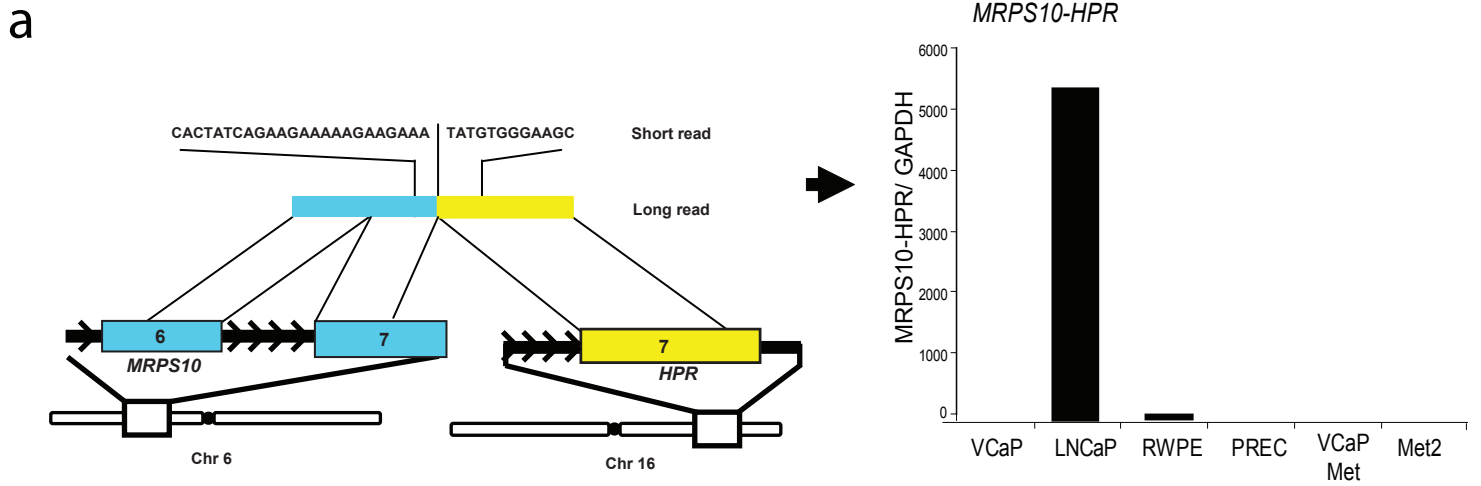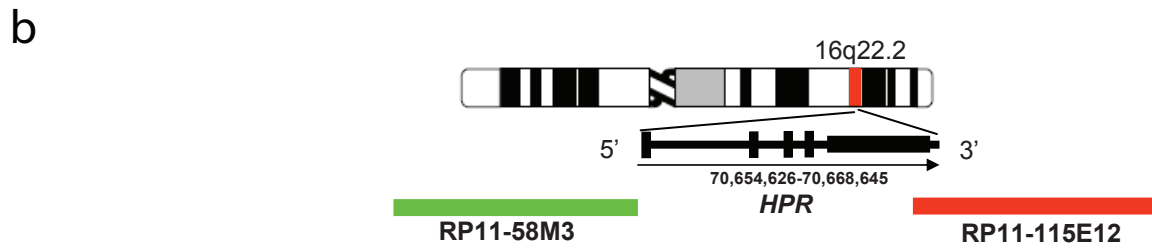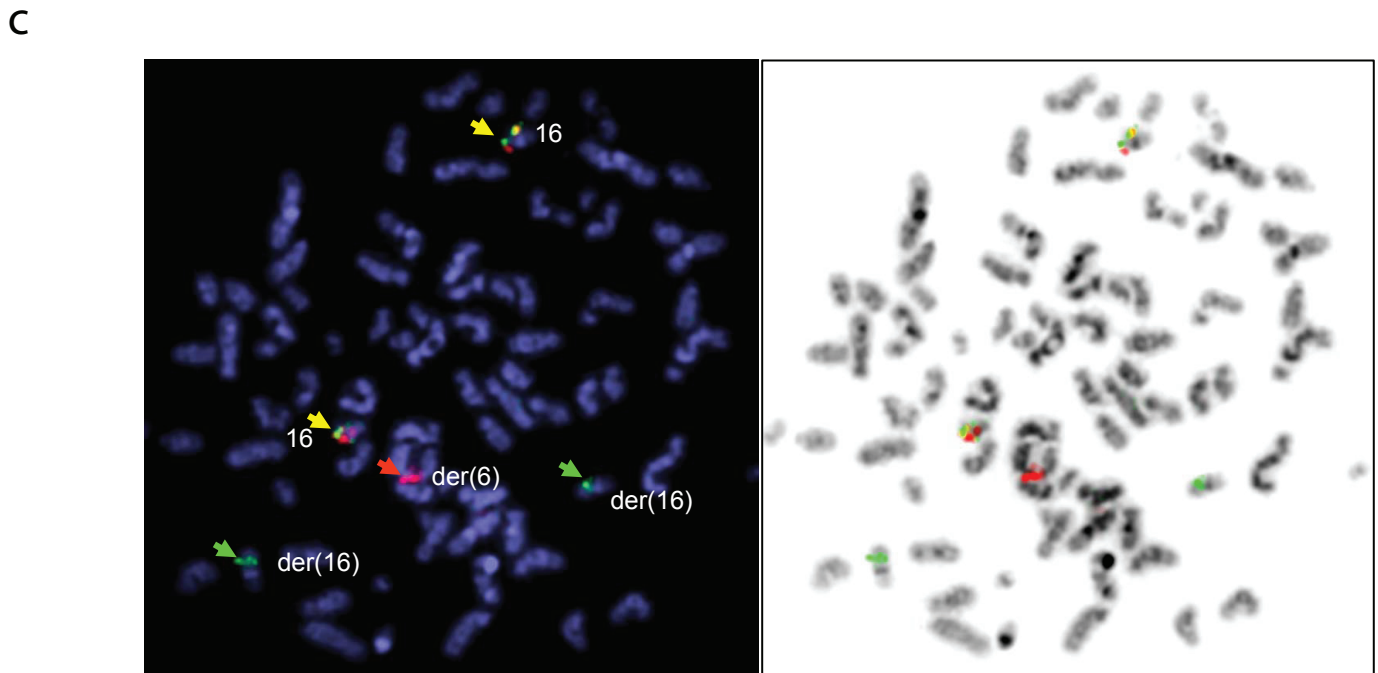

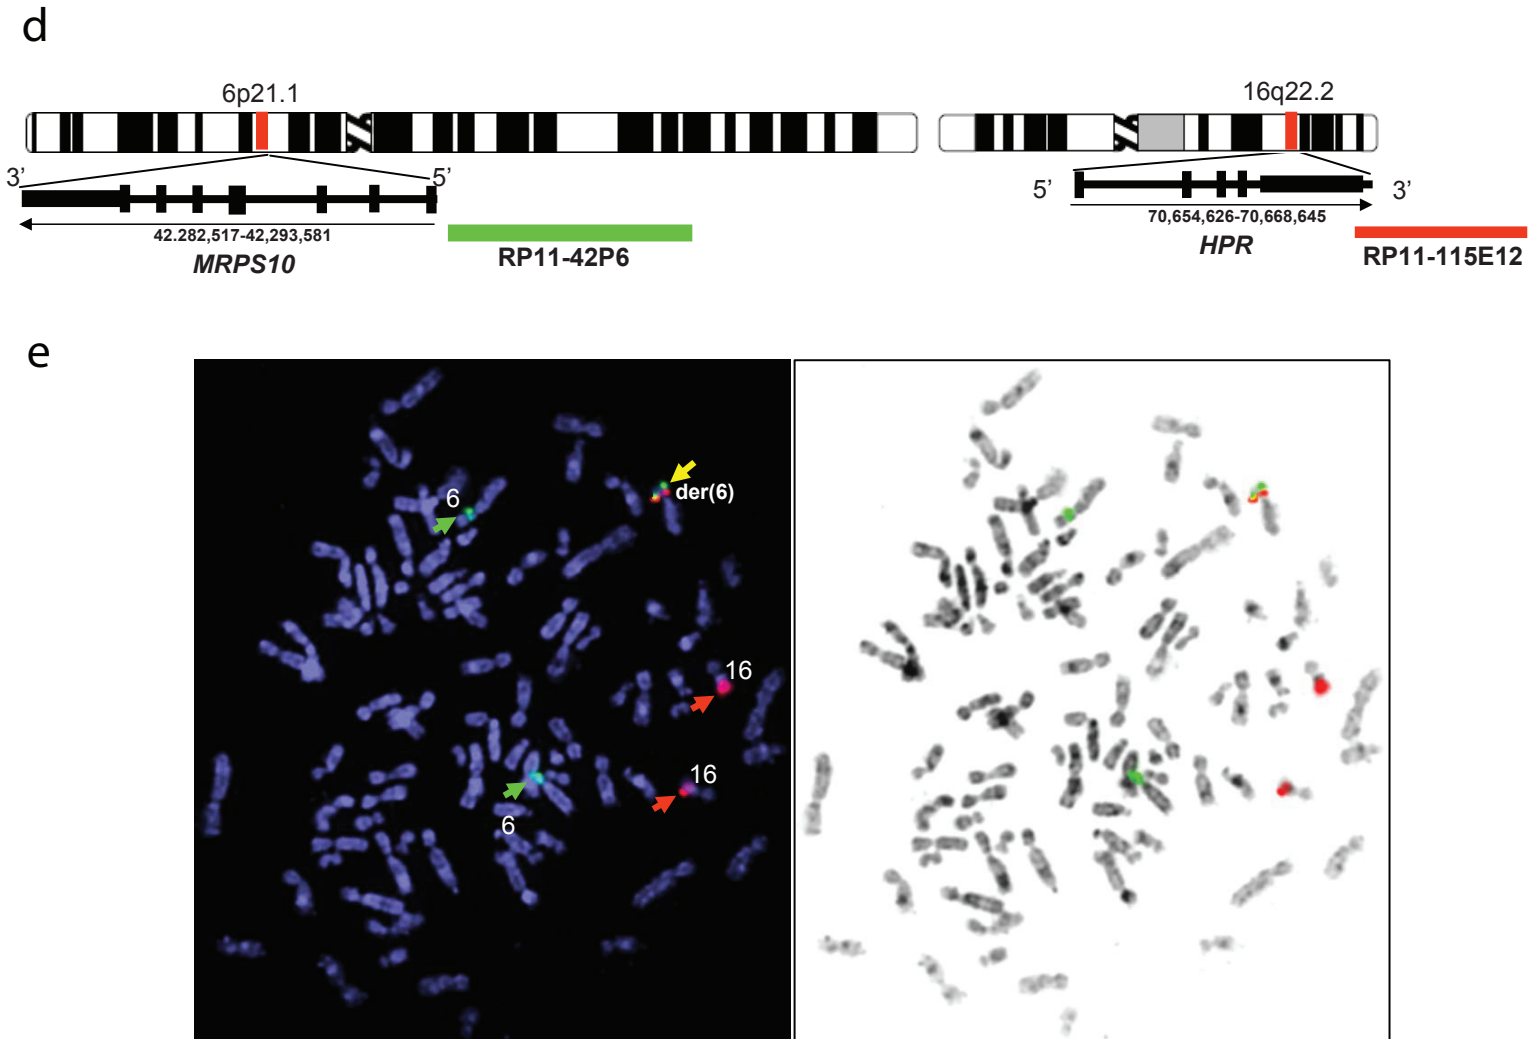

**Supplemental Figure 14: FISH analysis of the chromosomal rearrangements involving *MRPS10* and *HPR*.** **a**, Schematic of the *MRPS10*-*HPR* fusion. The exons 6-7 of *MRPS10* (blue) located on chromosome 6 are fused with exon 7 of *HPR* (yellow), on chromosome 16. **b**, Schematic diagram showing the genomic organization of the *HPR* gene locus. The horizontal green and red bars indicate the approximate location of the BAC clones from the 5' and 3' end of the gene, respectively. **c**, FISH image from LNCaP cells show two copies of normal chromosome 16 (yellow arrows), two copies of derivative chromosome 16 [der(16)] (green arrows), and single red signal on derivative chromosome 6 [der(6)] confirming a rearrangement in the *HPR* gene. **d**, Schematic diagram showing the genomic organization of the *MRPS10* and *HPR* gene locus. The horizontal green and red bars indicate the approximate location of the BAC clones from the 5' and 3' end of *MRPS10* and *HPR* genes, respectively. **e**, FISH image from LNCaP cells show hybridization of *MRPS10* probe to two copies of chromosome 6 (green arrows), and red arrows indicate the hybridization of *HPR* probe to two copies of normal chromosome 16. A single co-localizing green and red signal (yellow arrow) on der(6) confirms the fusion of *MRPS10* with *HPR*.

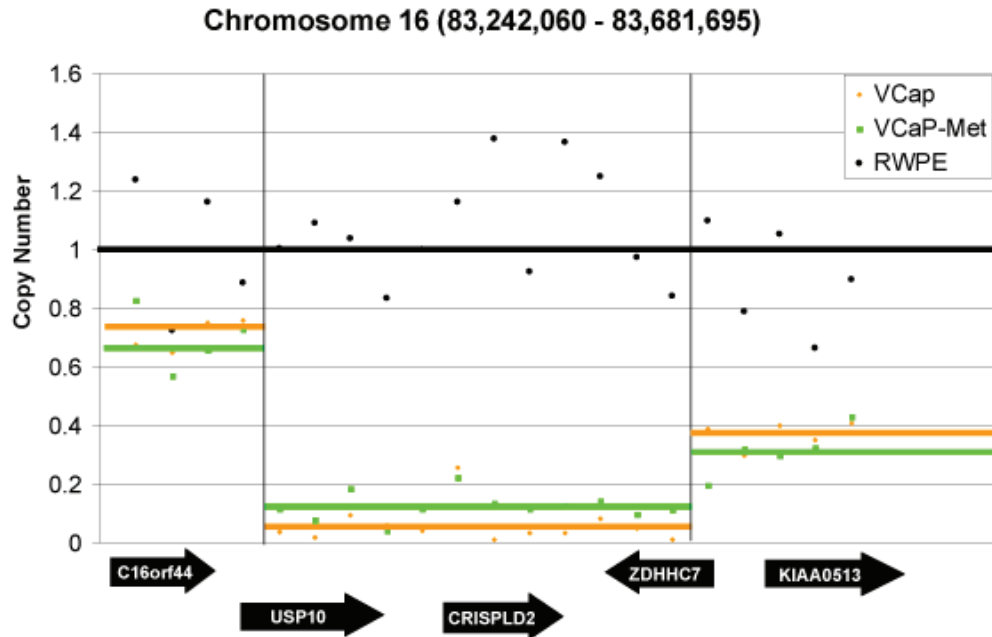

**Supplemental Figure 15: Plot of genomic aberrations on chromosome 16 located near the *USP10-ZDHHC7* fusion, as seen by array CGH. A deletion involving the two genes is observed in VCaP (orange) and the VCaP parental tissue (VCaP-Met) (green), but not in normal prostate cell line, RWPE (black).**



## SUPPLEMENTARY REFERENCES:

- 1 Mitelman F, J. B. a. M. F. E., (Cancer Genome Anatomy Project, 2008).
- 2 Greenman, C. *et al.*, Patterns of somatic mutation in human cancer genomes. *Nature* **446** (7132), 153 (2007).
- 3 Weir, B. A. *et al.*, Characterizing the cancer genome in lung adenocarcinoma. *Nature* **450** (7171), 893 (2007).
- 4 Wood, L. D. *et al.*, The genomic landscapes of human breast and colorectal cancers. *Science* **318** (5853), 1108 (2007).
- 5 Barber, T. D., B. Vogelstein, K. W. Kinzler & V. E. Velculescu, Somatic mutations of EGFR in colorectal cancers and glioblastomas. *The New England journal of medicine* **351** (27), 2883 (2004).
- 6 Stephens, P. *et al.*, A screen of the complete protein kinase gene family identifies diverse patterns of somatic mutations in human breast cancer. *Nature genetics* **37** (6), 590 (2005).
- 7 Stephens, P. *et al.*, Lung cancer: intragenic ERBB2 kinase mutations in tumours. *Nature* **431** (7008), 525 (2004).
- 8 Campbell, P. J. *et al.*, Identification of somatically acquired rearrangements in cancer using genome-wide massively parallel paired-end sequencing. *Nature genetics* **40** (6), 722 (2008).
- 9 Parsons, D. W. *et al.*, An integrated genomic analysis of human glioblastoma multiforme. *Science (New York, N.Y)* **321** (5897), 1807 (2008).
- 10 Cheung, V. G. *et al.*, Integration of cytogenetic landmarks into the draft sequence of the human genome. *Nature* **409** (6822), 953 (2001).
- 11 Strausberg, R. L., K. H. Buetow, M. R. Emmert-Buck & R. D. Klausner, The cancer genome anatomy project: building an annotated gene index. *Trends Genet* **16** (3), 103 (2000).
- 12 Soda, M. *et al.*, Identification of the transforming EML4-ALK fusion gene in non-small-cell lung cancer. *Nature* **448** (7153), 561 (2007).
- 13 Tomlins, S. A. *et al.*, Recurrent fusion of TMPRSS2 and ETS transcription factor genes in prostate cancer. *Science* **310** (5748), 644 (2005).
- 14 Rikova, K. *et al.*, Global Survey of Phosphotyrosine Signaling Identifies Oncogenic Kinases in Lung Cancer. *Cell* **131**, 14 (2007).
- 15 Kato, T. *et al.*, Activation of Holliday junction recognizing protein involved in the chromosomal stability and immortality of cancer cells. *Cancer research* **67** (18), 8544 (2007).
- 16 Bashir, A., S. Volik, C. Collins, V. Bafna & B. J. Raphael, Evaluation of paired-end sequencing strategies for detection of genome rearrangements in cancer. *PLoS computational biology* **4** (4), e1000051 (2008).
- 17 Korenchuk, S. *et al.*, VCaP, a cell-based model system of human prostate cancer. *In vivo (Athens, Greece)* **15** (2), 163 (2001).
- 18 Rubin, M. A. *et al.*, Rapid ("warm") autopsy study for procurement of metastatic prostate cancer. *Clin Cancer Res* **6** (3), 1038 (2000).
- 19 Karolchik, D. *et al.*, The UCSC Table Browser data retrieval tool. *Nucleic Acids Res* **32** (Database issue), D493 (2004).

- 20 Abouelhoda, M. I., S. Kurtz & E. Ohlebusch, Replacing suffix trees with enhanced  
suffix arrays. *Journal of Discrete Algorithms* **2** (1), 53 (2004).
- 21 Kent, W. J., BLAT--the BLAST-like alignment tool. *Genome research* **12** (4), 656  
(2002).
- 22 Communi, D., N. Suarez-Huerta, D. Dussossoy, P. Savi & J. M. Boeynaems,  
Cotranscription and intergenic splicing of human P2Y11 and SSF1 genes. *The*  
*Journal of biological chemistry* **276** (19), 16561 (2001).
- 23 Tomlins, S. A. *et al.*, Distinct classes of chromosomal rearrangements create  
oncogenic ETS gene fusions in prostate cancer. *Nature* **448** (7153), 595 (2007).
- 24 Vandesompele, J. *et al.*, Accurate normalization of real-time quantitative RT-PCR  
data by geometric averaging of multiple internal control genes. *Genome biology* **3** (7),  
34 (2002).
